1 **Title: Transient Polycomb activity represses developmental genes in growing oocytes.**

2  
3  
4 **Authors:** [Ellen G. Jarred](#)<sup>1</sup>, Zhipeng Qu<sup>2</sup>, Tesha Tsai<sup>1</sup>, Ruby Oberin<sup>1</sup>, Sigrid Petautschnig<sup>1</sup>, Heidi  
5 Bildsoe<sup>1</sup>, Stephen Pederson<sup>2</sup>, Qing-hua Zhang<sup>3</sup>, Jessica M. Stringer<sup>3</sup>, John Carroll<sup>3</sup>, David K.  
6 Gardner<sup>4</sup>, Maarten van den Buuse<sup>5</sup>, Natalie A. Sims<sup>6</sup>, William T. Gibson<sup>7</sup>, David L. Adelson<sup>2</sup>,  
7 Patrick S. Western<sup>1\*</sup>

8  
9 **Affiliations:** <sup>1</sup>Centre for Reproductive Health, Hudson Institute of Medical Research and Department of Molecular  
10 and Translational Science, Monash University, Clayton, Victoria, Australia; <sup>2</sup>Department of Bioinformatics and  
11 Computational Genetics, School of Biological Sciences, University of Adelaide, Adelaide, South Australia, Australia;  
12 <sup>3</sup>Biomedicine Discovery Institute, Monash University, Clayton, Victoria, Australia; <sup>4</sup>School of BioSciences, University  
13 of Melbourne, Parkville, Victoria, Australia; <sup>5</sup>School of Psychology and Public Health, La Trobe University, Melbourne,  
14 Victoria, Australia; <sup>6</sup>Bone Cell Biology and Disease Unit, St. Vincent's Institute of Medical Research and Department  
15 of Medicine at St. Vincent's Hospital, Fitzroy, Victoria, Australia; <sup>7</sup>Department of Medical Genetics, University of  
16 British Columbia and British Columbia Children's Hospital Research Institute, Vancouver, BC, Canada.

17  
18 \* Corresponding author: [patrick.western@hudson.org.au](mailto:patrick.western@hudson.org.au)

19  
20  
21 **Abstract**

22  
23 **Background:** Non-genetic disease inheritance and offspring phenotype is substantially influenced  
24 by germline epigenetic programming, including genomic imprinting. Loss of Polycomb Repressive  
25 Complex 2 (PRC2) function in oocytes causes non-genetically inherited effects on offspring,  
26 including embryonic growth restriction followed by post-natal offspring overgrowth. While PRC2  
27 dependent non-canonical imprinting is likely to contribute, less is known about germline  
28 epigenetic programming of non-imprinted genes during oocyte growth. In addition, *de novo*  
29 germline mutations in genes encoding PRC2 lead to overgrowth syndromes in human patients,  
30 but the extent to which PRC2 activity is conserved in human oocytes is poorly understood.

31 **Results:** In this study we identify a discrete period of early oocyte growth during which PRC2 is  
32 expressed in mouse growing oocytes. Deletion of *Eed* during this window led to the de-repression  
33 of 343 genes. A high proportion of these were developmental regulators, and the vast majority  
34 were not imprinted genes. Many of the de-repressed genes were also marked by the PRC2-  
35 dependent epigenetic modification histone 3 lysine 27 trimethylation (H3K27me3) in primary-  
36 secondary mouse oocytes, at a time concurrent with PRC2 expression. In addition, we found  
37 H3K27me3 was also enriched on many of these genes by the germinal vesicle (GV) stage in human  
38 oocytes, strongly indicating that this PRC2 function is conserved in the human germline. However,  
39 while the 343 genes were de-repressed in mouse oocytes lacking EED, they were not de-repressed  
40 in pre-implantation embryos and lost H3K27me3 during pre-implantation development. This  
41 implies that H3K27me3 is a transient feature that represses a wide range of genes in oocytes.

42 **Conclusions:** Together, these data indicate that EED has spatially and temporally distinct  
43 functions in the female germline to repress a wide range of developmentally important genes,  
44 and that this activity is conserved in the mouse and human germlines.

45  
46 **Keywords**

47  
48 Polycomb, oocyte, programming, epigenetic, H3K27me3, inheritance

## 50 **Background**

51  
52 Epigenetic modifications, including DNA methylation and histone modifications, regulate  
53 chromatin packaging and underlie long-term cell-specific gene transcription patterns. Amongst  
54 other chromatin regulatory functions, many of these modifications are essential for cell  
55 differentiation and provide mechanisms for maintaining lineage-specific identity and cell  
56 functions through the life of an organism. Conversely, dysregulation of epigenetic modifications  
57 contributes to a wide range of diseases and syndromes, including congenital anomalies, cancer,  
58 diabetes and behavioural conditions (1-4).

59  
60 The maternal and paternal genomes transmit genetic and epigenetic information to offspring at  
61 fertilisation. While oocyte and sperm chromatin are respectively organised in distinct histone and  
62 protamine-mediated structures, the vast majority of maternal and paternal alleles achieve  
63 epigenetic equivalence within a short period after fertilisation, a process that relies partly on  
64 proteins and RNAs that are maternally inherited in the oocyte. However, some genes maintain  
65 parent-specific epigenetic patterns that were established during sperm and oocyte development.  
66 In mice and humans, these genes include around 120 imprinted genes that are typically marked  
67 either by maternal or paternal DNA methylation, an epigenetic state that is transmitted to, and  
68 maintained in offspring and is essential for parent-of-origin specific gene regulation during  
69 development (5-8). While genomic imprinting provides an unequivocal example of epigenetic  
70 inheritance, evidence for other epigenetically inherited states that may affect biallelically  
71 expressed genes are rare and the mechanisms underlying such inheritance are poorly understood  
72 (5). Given the potential for epigenetic states to influence offspring development, identifying the  
73 specific chromatin-modifying complexes that epigenetically regulate developmental genes and  
74 may influence establishment of an appropriate epigenetic landscape in oocytes would enhance  
75 understanding of the mechanisms underlying inherited phenotypes and disease, and of how  
76 these mechanisms may contribute to evolution.

77  
78 Histone 3 Lysine 27 trimethylation (H3K27me3) is a critical epigenetic modification catalysed by  
79 the Polycomb Repressive Complex 2 (PRC2). PRC2 contains three essential core protein subunits:  
80 Suppressor of Zeste 12 (SUZ12), Embryonic Ectoderm Development (EED) and Enhancer of Zeste  
81 1/2 (EZH1/2), all of which are required for histone methyltransferase activity (9-12). While EZH2

82 can function in PRC2-independent roles, EED is only known to mediate methylation of H3K27 as  
83 an essential component of PRC2 (13-19). Specific examples include an essential role for EED in  
84 repressing a wide range of developmentally important genes in embryonic stem cells (ESCs)  
85 through its essential role in establishing H3K27me<sub>3</sub> (12, 20). While EZH2 also plays a major role  
86 in the repression of the same genes, the closely related protein EZH1 acts in a partially redundant  
87 manner and contributes both to H3K27me<sub>3</sub> enrichment and gene repression (12). In other  
88 contexts, EZH2 can directly methylate non-histone target proteins such as PLZF in B lymphocytes  
89 of the immune system, and GATA4 in mouse fetal cardiomyocytes *in vivo* (13, 17).

90  
91 PRC2 also plays important roles in sperm and oocytes, and throughout development. *De novo*  
92 germline mutations in human *EED*, *EZH2* and *SUZ12* underlie Cohen-Gibson, Weaver and  
93 Imagawa-Matsumoto syndromes which are characterised by perinatal overgrowth, skeletal  
94 malformation and cognitive deficit (21-30). Multiple studies in mice indicate that EZH2 and EED  
95 act as maternal factor proteins and/or mRNA that are required in mature oocytes to regulate the  
96 establishment and maintenance of X-inactivation in pre-implantation embryos (31-34). In  
97 addition, PRC2 regulates DNA methylation-independent non-canonical imprinting in mouse  
98 oocytes, a process that involves H3K27me<sub>3</sub>-dependent programming and paternally-biased  
99 expression of up to 20 genes in pre-implantation embryos and five genes in extraembryonic  
100 ectoderm and placenta until embryonic day (E)9.5 (8, 35). Maternal deletion of *Eed* resulted in  
101 loss of H3K27me<sub>3</sub> imprints, biallelic expression of H3K27me<sub>3</sub>-imprinted genes in pre-  
102 implantation embryos and extraembryonic ectoderm, transient ectopic X-inactivation and male-  
103 biased embryo loss (33, 34). Moreover, mouse offspring generated by somatic cell nuclear  
104 transfer (SCNT) are typically born large as a result of placental hyperplasia, a phenotype that is  
105 caused by loss of H3K27me<sub>3</sub> imprinting primarily of *Slc38a4* and *Sfmbt2*-embedded micro-RNAs  
106 specifically in the placenta (36-38). Although H3K27me<sub>3</sub> imprinting specifically affects the  
107 placenta, embryonic growth restriction was also observed in embryos derived from oocytes  
108 lacking EED, but the cause of this phenotype is not understood (33). While H3K27me<sub>3</sub>-dependent  
109 imprinting (non-canonical) has been recently identified, classical (or canonical) genomic  
110 imprinting is much more extensively studied and is generally considered to be mediated by DNA  
111 methylation (8, 39). Here, we refer to canonical DNA methylation-based genomic imprints as  
112 classical imprinting and non-canonical imprinting as H3K27me<sub>3</sub>-dependent imprinting.

114 We previously found that deletion of *Eed* in growing oocytes led to post-natal overgrowth of  
115 offspring, indicating that maternally-derived PRC2 mediates effects on offspring that were  
116 independent of maternal genetic inheritance (40). To understand the potential mechanisms  
117 underlying developmental outcomes in offspring from *Eed* null oocytes, we explored the role of  
118 PRC2 in oocytes. We demonstrate that EZH2, EED and SUZ12 are transiently expressed during the  
119 earliest stages of oocyte growth to establish H3K27me3 in the promoters of developmentally  
120 important genes in mice, and that H3K27me3 is conserved on many of these genes in human GV  
121 stage oocytes. In mice, PRC2 activity immediately preceded the upregulation of the essential *de*  
122 *novo* DNA methylation co-factor DNMT3L, indicating that patterning of PRC2 target genes  
123 precedes DNA methylation. While *Eed* repressed several imprinted genes in oocytes, 98% of the  
124 PRC2 target genes we identified were not imprinted, but were genes that regulate neurogenesis,  
125 haematopoiesis and other processes in tissue morphogenesis. These genes were not  
126 dysregulated in pre-implantation offspring and lost H3K27me3 during this period of development  
127 in wild type (*wt*) embryos.

128

## 129 **Results**

130

### 131 **EZH2, EED and SUZ12 localise to chromatin during a discrete period of primary to secondary** 132 **oocyte growth**

133 Previous studies have provided varying reports of EED, EZH2 and SUZ12 in GV stage and mature  
134 oocytes, and zygotes (31, 41-43), but the stages at which all three core components of PRC2 are  
135 detected in growing oocytes have not been defined. To determine when PRC2 is detected in the  
136 nucleus or associated with chromosomes in growing, GV and MII oocytes, and in zygotes, we  
137 profiled EZH2, SUZ12 and EED throughout oocyte growth in *wt* mice using immunofluorescence  
138 (IF). EZH2 was detected in the oocyte nucleus of primordial to antral stage follicles, but SUZ12  
139 and EED were detected only in primary and secondary follicle oocytes and not in primordial or  
140 antral stage oocytes (Fig. 1A). Notably, co-expression of EED, EZH2 and SUZ12 in primary-  
141 secondary follicle oocytes occurred immediately before the expression of DNMT3L (DNA  
142 methyltransferase 3-Like), which marks the onset of *de novo* DNA methylation in growing oocytes  
143 (Fig. 1B), consistent with the initiation of H3K27me3 in oocytes prior to DNA methylation (44).  
144 While EZH2 was detected in the nuclei of fully-grown surrounded nucleolus (SN) GV oocytes,  
145 SUZ12 and EED were not (Fig. 1C). Although PRC2 has been detected in the cytoplasm of mature  
146 metaphase II (MII) oocytes (41-43), EED, EZH2 and SUZ12 were not detected on the chromosomes

147 of MII oocytes in this study (Fig. 1D). However, all three PRC2 components were readily detected  
148 in maternal and paternal pronuclei of zygotes approximately 12 hours (h) post-fertilization (Fig.  
149 1E). As embryonic activity of PRC2 does not occur until the 4-cell to morula stage (31, 34), the  
150 rapid recruitment of PRC2 to the pronuclei may reflect a supply of cytoplasmic PRC2 proteins (41-  
151 43) or could be derived from mRNAs in the mature oocyte. Taken together, these data identify a  
152 transient window during which all three PRC2 components are present and may therefore  
153 contribute to PRC2-dependent epigenetic programming in primary-secondary oocytes,  
154 immediately before genome-wide *de novo* DNA methylation and prior to the formation of GV-  
155 oocytes.

156

### 157 **PRC2 is required for repression of developmental genes in growing oocytes**

158 To investigate whether the transient activity of PRC2 in oocytes of primary-secondary follicles has  
159 functional importance, we deleted *Eed* using *Zp3Cre*, which leads to target gene excision  
160 specifically in oocytes from the primary follicle stage (40, 45). Mating *Eed<sup>fl/fl</sup>* females and  
161 *Eed<sup>fl/+</sup>;Zp3Cre* males yielded *Eed<sup>fl/fl</sup>* (*Eed-wt*), *Eed<sup>fl/+</sup>;Zp3Cre* (*Eed-het*) and *Eed<sup>fl/fl</sup>;Zp3Cre* (*Eed-hom*)  
162 females. Following deletion of *Eed*, H3K27me3 was reduced by 35% in primary follicles of *Eed-*  
163 *hom* females (Fig. 2A-B). Depletion of H3K27me3 continued in secondary follicles (Fig. 2A, C), and  
164 was almost completely lost in fully-grown GV oocytes, with 85% and 93% reductions in global  
165 H3K27me3 in *Eed-hom* oocytes compared to *Eed-wt* at these stages respectively (Fig. 2A, 2C, 3A-  
166 B).

167

168 To determine how loss of H3K27me3 impacted oocyte transcription, we collected *Eed-wt*, *Eed-*  
169 *het*, *Eed-hom* and *Eed<sup>+/+</sup>;Zp3Cre* (*Eed-wt Cre* control) fully-grown SN GV oocytes and performed  
170 RNA-seq. The proportion of SN GV oocytes in *Eed-hom* females was 65% compared to 58% in *Eed-*  
171 *wt* females (Supp. Fig. 1), demonstrating that loss of EED and H3K27me3 did not detrimentally  
172 affect formation of fully-grown oocytes. Principal component analysis revealed that *Eed-hom*  
173 oocytes were transcriptionally distinct from *Eed-het* and *Eed-wt* oocytes (Fig. 3C). Further analysis  
174 identified 349 genes that we termed *Eed* oocyte Differentially-Expressed Genes (DEGs) as they  
175 were differentially expressed between *Eed-hom* and *Eed-het* oocytes (FDR<0.05; Fig. 3D; Supp.  
176 Table 1). Strikingly, 98% (343 genes) of the *Eed* oocyte DEGs were derepressed, and only 2% (six  
177 genes), including *Eed*, were downregulated (Fig. 3D-E; Supp. Table 1). H3K27me3 levels were not  
178 different and only two *Eed* oocyte DEGs (*Mt1* and *Exoc*) as well as *Eed* were identified between

179 *Eed-wt* and *Eed-het* oocytes (Fig. 3A-B), indicating that EED function in *Eed-wt* and *Eed-het*  
180 oocytes was similar. As EED protein was only detected in primary-secondary oocytes prior to the  
181 GV stage, these data strongly indicate that PRC2 establishes a repressive state in primary and  
182 secondary follicle oocytes that is maintained in GV oocytes.

183  
184 Gene ontology (GO) and ingenuity pathway analyses (IPA) revealed that the *Eed* oocyte DEGs  
185 were strongly associated with fetal development, including the IPA categories of nervous system  
186 development (23.81%), haematopoiesis (23.81%), cell migration and morphology (21.43%) and  
187 developmental disorders (19.05%; Fig. 3F-G). Several genes involved in bone development,  
188 including *Prrx*, *Gli2*, *Sox5*, *Sox6*, *Hoxd9*, *Hoxd13*, *Bmp7*, *Sik3* and *Dcn* were also de-repressed  
189 (Supp. Table 1). The neurogenesis and bone developmental genes are of interest as impaired  
190 skeletal and cognitive development are prominent features of Cohen-Gibson syndrome which  
191 results from *de novo* germline mutations in *EED* (21-23, 26). Although 4.67% of the *Eed* oocyte  
192 DEGs were associated with “litter size and fertility”, categories associated with oocyte or ovarian  
193 development were not represented (Fig. 3G). Moreover, similar numbers of oocytes in *Eed-hom*,  
194 *Eed-het* and *Eed-wt* females indicated that oocyte growth and formation of fully-grown oocytes  
195 was not impeded (Supp. Fig. 1). Together, these observations strongly suggested that PRC2  
196 establishes repressive H3K27me3 on a wide range of developmentally important genes during  
197 oocyte growth, >95% of which were not primarily involved in oogenesis. Surprisingly, comparison  
198 of the *Eed* oocyte DEGs with 209 transcription factors identified as direct target genes of PRC1  
199 and PRC2 in embryonic stem cells (20) identified only 8 common genes (*Hoxd9*, *Hoxd13*, *Otx1*,  
200 *Lhx2*, *Six1*, *Nr2f2*, *Ovol1* and *Nfatc1*), indicating that the genes that were de-repressed on *Eed* null  
201 oocytes were not typical Polycomb target genes in ESCs (Supp Table 2).

202  
203 **PRC2 regulates establishment of H3K27me3 on developmental genes in growing oocytes**

204 To determine whether H3K27me3 was normally present in the promoters of *Eed* oocyte DEGs in  
205 GV oocytes we compared the *Eed* oocyte DEGs to H3K27me3 Chromatin Immunoprecipitation-  
206 sequencing (ChIP-seq) datasets from wild type mouse GV and MII oocytes from Zheng and  
207 colleagues and Liu and colleagues (44, 46). Of 349 *Eed* oocyte DEGs, the majority were identified  
208 both in the Zheng and Liu datasets (328 in Zheng, and 312 in Liu). Of the 328 genes from Zheng *et*  
209 *al.*, 111 (34%) and 127 (39%) had H3K27me3 peaks in GV and MII oocyte datasets, and 169 (52%)  
210 had H3K27me3 peaks in the Liu MII dataset (Supp Table 3). Comparison of all datasets (our *Eed*

211 oocyte DEGs with the Zheng GV and MII and Liu MII datasets) identified 99 DEGs with H3K27me3  
212 in all three ChIP-seq datasets, which we defined as ‘high confidence H3K27me3-enriched oocyte  
213 DEGs (Fig. 4A; Supp. Table 4). Of these 99 genes, comparison with data from a study of H3K27me3  
214 in sperm (47) revealed that 88 also carried H3K27me3 on the paternal allele indicating that the  
215 majority of these genes are subject to H3K27 methylation in both the male and female germlines  
216 (Supp. Table 4). While only ~30% of the *Eed* oocyte DEGs contained H3K27me3 under these highly  
217 stringent criteria, we propose that this is a conservative estimate given that low input ChIP-seq  
218 data were used, potentially limiting sensitivity compared to RNA-seq analysis. Supporting this,  
219 114 H3K27me3-enriched DEGs overlapped between the Liu and Zheng MII datasets, indicating  
220 that not all genes with H3K27me3 were consistently detected in the ChIP-seq analyses.

221  
222 Gradual enrichment of H3K27me3 has been demonstrated in growing oocytes (44). Using these  
223 additional ChIP-seq datasets (44), we next investigated at what stage H3K27me3 peaks were  
224 established at the high confidence H3K27me3-enriched oocyte DEGs by determining the  
225 H3K27me3 state at the promoter regions of these genes in post-natal day (P)7 (primary) and P14  
226 (secondary) growing oocytes. None of the 99 high confidence H3K27me3-enriched oocyte DEGs  
227 had H3K27me3 peaks in primary (P7) oocytes, but 83 had H3K27me3 peaks in secondary (P14)  
228 oocytes and all 99 DEGs had H3K27me3 in GV and MII oocytes (Fig. 4B; Supp. Table 4).  
229 Accordingly, each of these genes were upregulated in *Eed-hom* GV oocytes (Fig. 4C). Collectively,  
230 these data demonstrate that H3K27me3 was established within the promoters of developmental  
231 genes during the window in which all three core components of PRC2 were detected in primary-  
232 secondary oocytes and that EED was required for their repression given that these genes were  
233 de-repressed in *Eed*-null GV oocytes.

234  
235 **PRC2 establishment of H3K27me3 at developmental genes is conserved in human oocytes**

236 To understand whether the mouse *Eed* oocyte DEGs were also enriched for H3K27me3 in human  
237 oocytes, we examined published H3K27me3 data from human GV oocytes (48), defining promoter  
238 regions 2000bp upstream – 2000bp downstream of the TSS as we did for the mouse datasets. Of  
239 349 *Eed* oocyte DEGs, 37 were excluded as ‘not conserved in human’, including 25 predicted  
240 genes, RIKEN transcripts or pseudogenes (Fig. 4D; Supp. Table 3). Of the 312 remaining *Eed* oocyte  
241 DEGs, 132 contained H3K27me3 in their promoters in human GV oocytes (Fig 4D; Supp. Table 3;  
242 Supp. Table 5). Of the 132 *Eed* oocyte DEGs containing H3K27me3 in human GV oocytes, 79 and

243 54 also contained H3K27me3 in the mouse MII and GV datasets generated by Liu *et al.* and Zheng  
244 *et al.*, respectively (Supp. Table 5 (44, 46)). Moreover, all 132 *Eed* oocyte DEGs identified as  
245 H3K27me3 enriched in human were upregulated in *Eed-hom* oocytes (Fig. 4E). In common with  
246 the lack of nuclear-localised EED or SUZ12 protein in mouse GV oocytes (Fig. 1C), human GV  
247 oocytes lack *EED* and *SUZ12* transcripts (48). Together, with the observation that *Eed* oocyte DEGS  
248 are almost exclusively de-repressed with the loss of EED and H3K27me3, these data strongly  
249 indicate that H3K27me3 establishment occurs on *Eed* oocyte DEGs prior to the GV stage in both  
250 human and mouse growing oocytes.

251

### 252 ***Eed* oocyte DEGs include non-imprinted autosomal, imprinted and X-linked genes**

253 As EED regulates DNA methylation-independent H3K27me3 imprinting in oocytes, we compared  
254 the *Eed* oocyte DEGs against a previously published list of 76 putative H3K27me3-imprinted genes  
255 (35). Of the 349 *Eed* oocyte DEGs we identified in GV oocytes, five (*Bbx*, *Bmp7*, *Rbms1*, *Sall3* and  
256 *Prox1*) were putative H3K27me3 imprinted genes (Fig. 5A; Supp. Table 6). These genes were all  
257 upregulated in *Eed-hom* oocytes (Fig. 5B), demonstrating that EED is required for their repression  
258 in oocytes. Of interest, analysis of a sperm ChIP-seq dataset (47) revealed that all five genes also  
259 contained H3K27me3 on the paternal allele, indicating that these genes have similar H3K27me3  
260 signatures in male and female gametes (Supp. Table 3). Of these five genes, paternally biased  
261 expression was observed for three in androgenetic morula (*Bbx*, *Bmp7* and *Rbms1*) and one in  
262 blastocysts (*Rbms1*) (35). Notably, Inoue *et al.* identified five H3K27me3-imprinted genes (*Gab1*,  
263 *Phf17*, *Sfmbt2*, *Slc38a4* and *Smoc1*) that maintain paternal biased expression in epiblast, visceral  
264 endoderm, extra-embryonic ectoderm and/or E9.5 placenta (35). Loss of imprinting at either  
265 *Slc38a4* or micro-RNAs within *Sfmbt2* has been functionally associated with placental hyperplasia  
266 in SCNT derived offspring (36, 38). In addition, *Smoc1* and *Gab1* have also been implicated in this  
267 phenotype (37). However, none of these genes were *Eed* oocyte DEGs (Supp. Table 6).

268

269 In order to determine whether any *Eed* oocyte DEGs were imprinted genes, we also compared  
270 the 349 *Eed* oocyte DEGs to 325 known or predicted classically imprinted genes in mice (49, 50).  
271 Ten *Eed* oocyte DEGs were identified as imprinted genes (Fig. 5C; Supp. Table 6; *Zdbf2*, *Ifitm10*,  
272 *Phlda2*, *Rbms1*, *Bmp7*, *Bbx*, *Flt3*, *Slc22a18*, *Cobl* and *Cysltr2*). As with the putative H3K27me3-  
273 imprinted genes, these were all upregulated in *Eed-hom* oocytes (Fig. 5D) indicating that EED is  
274 required to silence these genes in oocytes. Analysis of the sperm dataset (47) revealed that all of



275 these genes contained H3K27me3 on the paternal allele in sperm and three of these genes (*Bbx*,  
276 *Bmp7* and *Rbms1*) were also included on the H3K27me3-imprinted gene list (Supp. Table 3). In  
277 human GV oocytes *Bmp7*, *Sall3*, *Prox1*, *Zdbf2*, *Phlda2*, *Flt3* and *Ifitm10* also carried H3K27me3,  
278 but *Bbx*, *Rbms1*, *Cysltr2* and *Slc22a4* did not.

279  
280 In mice, X-inactivation is initiated after fertilisation from the 2/4 cell stage and is restricted to the  
281 paternal X-chromosome in pre-implantation offspring prior to establishment of random X-  
282 inactivation in embryonic cells after implantation. While PRC2 regulates X-inactivation in pre-  
283 implantation embryos and somatic cells of post-implantation embryos, the inactive X is  
284 reactivated in XX primordial germ cells and both X-chromosomes are active in growing oocytes  
285 (51-53). To determine whether there was any bias in gene silencing across the autosomes and the  
286 X-chromosome in EED-deficient oocytes we determined the relative representation of the *Eed*  
287 oocyte DEGs across all chromosomes. However, representation of the oocyte DEGs across the  
288 autosomes and X-chromosome was similar, with 19 of 349 genes X-located and no substantial  
289 bias towards the X-chromosome or particular autosomes (Fig. 5E; Supp. Table 7). As with most  
290 genes on the autosomes, of the 19 X-linked genes identified, 18 were upregulated in *Eed-hom*  
291 oocytes (Fig. 5F) demonstrating that EED and H3K27me3 contribute to silencing individual X-  
292 linked genes in the absence of X inactivation in oocytes.

293  
294 Together, these data indicated that of the 349 *Eed* oocyte DEGs identified, 12 were imprinted  
295 genes, 19 were located on the X-chromosome and the remaining 328 were non-imprinted  
296 autosomal genes, many of which are known to regulate development.

297  
298 **LINE-1 transposable elements were not de-repressed in *Eed*-null oocytes**

299 Previous studies have proposed and/or demonstrated a link between H3K27me3 and the  
300 repression of transposable elements (TEs) in fetal germ cells and embryonic stem cells when DNA  
301 methylation levels are low during epigenetic reprogramming (54-57). To determine whether  
302 transcription of transposable elements was affected in oocytes lacking EED, we demasked repeat  
303 sequences in our RNA-seq data and analysed the expression of LINE-1 (L1) elements. The total  
304 input reads indicated that similar percentages of L1 element reads aligned in *Eed-hom*, *Eed-het*  
305 and *Eed-wt* oocytes (Supp. Fig. 2A). Moreover, regardless of whether elements mapped uniquely  
306 or multi-mapped, read totals indicated similar expression levels for L1s in oocytes of all genotypes

307 (Supp. Fig. 2B). Analysis of the extent to which multiple reads occurred revealed that the majority  
308 of reads mapped 1, 2 or 3 times (accounting for ~80% of all reads), while around 10% mapped 4-  
309 5 times and the remaining reads mapped 5-20 times, with no differences in mapping between  
310 genotypes (Supp. Fig. 2C). Principal component analysis revealed overlapping clusters for samples  
311 for all genotypes and no differentially expressed L1 elements were identified based on a threshold  
312 of  $FDR < 0.05$  (Fig. 6A, B). Together these data indicate that loss of H3K27me3 in GV oocytes did  
313 not substantially alter L1 expression.

314

### 315 ***Eed* oocyte DEGs were not dysregulated in pre-implantation embryos**

316 Our observations revealed a highly specific window during which all three components of PRC2  
317 were present in primary-secondary oocytes and identified a role for EED in establishing  
318 H3K27me3 on a wide range of developmentally important genes in primary-secondary stage  
319 oocytes. As >95% of these genes are not known to regulate oocyte development, yet EED is  
320 required for their repression in oocytes, we proposed that loss of EED-dependent repression of  
321 these genes in oocytes may result in their de-repression in pre-implantation embryos. To  
322 determine if this was the case we re-analysed RNA-seq data from morula and blastocysts derived  
323 from *Gdf9Cre Eed* null (33) and *Zp3Cre Eed* null oocytes (34). The *Eed*-deleted oocyte-derived  
324 morulae contained 128 DEGs ( $P < 0.05$ , all with  $FDR \sim 1.0$ ; Supp. Table 8) and the blastocysts  
325 contained 400 DEGs ( $P < 0.05$ ;  $FDR < 0.05$ ; Supp. Table 9) compared to their *Eed-wt* oocyte-derived  
326 counterparts. Six *Eed* oocyte DEGs were dysregulated in morulae (*Plxnd1*, *Tceal8*, *Rap2c*, *Bbx*,  
327 *Xlr3c* and *Trmt2b*; Supp. Fig. 3), and five were dysregulated in blastocysts (*Chrdl1*, *Lonrf2*, *Trim6*,  
328 *Cyp1b1* and *Ccbe1*; Supp. Fig. 3). With the exception of *Tceal8* and *Bbx*, all were downregulated  
329 in pre-implantation embryos derived from *Eed*-null oocytes (Supp. Tables 8-9). Only two genes  
330 were commonly downregulated in the morulae and blastocyst datasets (*Tspan6* and *Gk*) and no  
331 genes were dysregulated in all three datasets (Supp. Fig. 3). Similarly, there were no genes in the  
332 morula DEGs and only seven genes (*Zfpm2*, *Pax9*, *Tbx4*, *Foxc2*, *Atoh8*, *Msx1* and *Vsx1*) in the  
333 blastocyst DEGs that were common with 209 genes identified as direct Polycomb target  
334 transcription factors in ESCs (Supp. Table 10; (20)).

335

336 To determine whether H3K27me3 was maintained at *Eed* oocyte DEGs in pre-implantation  
337 embryos, we used CUT&RUN data revealing the H3K27me3 state on the maternal and paternal  
338 alleles in morula stage embryos (Supp. Table 3) (33). Six *Eed* oocyte DEGs contained H3K27me3

339 on the maternal, but not the paternal allele in morula. Of the remaining 343 *Eed* oocyte DEGs,  
340 322 were devoid of H3K27me3 on both the maternal and paternal alleles. The maternal and  
341 paternal alleles were not distinguishable for 21 genes in the source dataset (33). These data  
342 indicate that H3K27me3 is normally cleared from the vast majority of *Eed* oocyte DEGs in morula  
343 stage embryos.

344

345

## 346 **Discussion**

347

348 In this study, we identified a discrete period during which all three core components of PRC2 co-  
349 localised to the nucleus in primary-secondary oocytes, that H3K27me3 was established on a wide  
350 range of developmental genes in this window and that EED was required to repress these genes  
351 in GV oocytes. This transient activity of PRC2 facilitated H3K27me3 establishment on a wide range  
352 of *Eed* oocyte DEGs immediately prior to DNMT3L upregulation, indicating that EED-dependent  
353 programming precedes *de novo* DNA methylation and that epigenetic programming is highly  
354 temporally and spatially regulated during oocyte growth. As many of the same genes were  
355 marked by EED-dependent H3K27me3 in mouse and human GV oocytes, the role of PRC2 appears  
356 to be conserved in human and mouse oocytes. These findings broaden the understanding of the  
357 temporal, spatial and functional activity of PRC2 in the female germline

358

359 The *Eed* oocyte DEGs identified included five H3K27me3 imprinted and seven classically imprinted  
360 genes (three of the classically imprinted genes detected were also listed as H3K27me3 imprinted  
361 genes). However, the vast majority of *Eed* oocyte DEGs were not known imprinted loci, but  
362 included many genes known to regulate cell differentiation during fetal development. Despite  
363 this, the *Eed* oocyte DEGs identified were not over-expressed in pre-implantation offspring and  
364 lost H3K27me3 during pre-implantation development. While the significance of PRC2 regulation  
365 of these genes requires further investigation, previous studies revealed that loss of EED in the  
366 oocyte affects early development and post-natal outcomes in opposing ways: offspring from *Eed*  
367 null oocytes exhibit both placental and offspring growth restriction at E10.5 (33), but were  
368 subsequently overgrown by early post-natal stages (40). While the mechanisms remain unclear,  
369 the collective data indicate that PRC2 acts at multiple levels of oocyte growth and pre-  
370 implantation development to modulate outcomes in offspring.

371

372 In previous studies there has been a significant focus on PRC2 as a maternal factor complex that  
373 regulates aspects of pre-implantation development, including X-inactivation (31-34, 58). In this  
374 study we detected EZH2 in oocytes from the primordial follicle stage through to the SN GV oocyte  
375 stage, whereas SUZ12 and EED were only identified within primary and secondary follicle stage  
376 oocytes. Since all three components are required for PRC2 methyltransferase activity (9-12), this  
377 identifies a discrete window in primary-secondary follicle oocytes during which PRC2 has the  
378 capacity to catalyse methylation of H3K27. While proteins for EED or SUZ12 were not detected in  
379 association with chromatin of GV and MII oocytes in our study, all three proteins were robustly  
380 detected in both maternal and paternal pronuclei 12 hours post-fertilisation, highlighting a role  
381 for maternally inherited PRC2 in zygotes. As previous reports detected SUZ12, EED and EZH2  
382 protein in MII oocytes using western blots (41, 42), it is likely that a maternal supply of protein  
383 resides in the cytoplasm but is difficult to detect using IF. However, it is also possible that maternal  
384 RNA for *Eed*, *Suz12* and *Ezh2* is inherited via the oocyte and is translated to facilitate enrichment  
385 of PRC2 in the maternal and paternal pronuclei of zygotes. Regardless of the mode of inheritance,  
386 these observations suggest that PRC2 has distinct activities that differentially impact epigenetic  
387 regulation in growing oocytes and affect pre-implantation development in offspring.

388  
389 Consistent with this, loss of EED in the oocyte affected different genes sets in oocytes and in pre-  
390 implantation offspring. While <5% of *Eed* oocyte DEGs were imprinted genes, the vast majority  
391 were not imprinted and many were associated with post-implantation cell differentiation and  
392 tissue development. Moreover, although EED was required for repression of these genes in  
393 oocytes, very few *Eed* oocyte DEGs were dysregulated in morula and blastocysts derived from  
394 *Eed*-null oocytes, and H3K27me3 was lost on these genes during pre-implantation development.  
395 While this is consistent with previous findings that many developmental genes lose H3K27me3  
396 during pre-implantation development (44), it also indicates that their repression at this stage does  
397 not require H3K27me3. Despite this, PRC2 is required in the oocyte for regulating a large cohort  
398 of genes in pre-implantation embryos that are distinct from the *Eed* DEGs identified here, and are  
399 dysregulated when *Eed* is deleted in oocytes. Thus, while EED is required for enriching H3K27me3  
400 and repressing a large cohort of developmental genes in primary-secondary oocytes, it also  
401 regulates a distinct set of genes in pre-implantation embryos. Therefore, PRC2 functions both to  
402 epigenetically program a wide range of imprinted and non-imprinted genes in oocytes and acts  
403 as a maternal factor in the zygote.

404

405 Our data indicates that H3K27me3 was established in the promoters of *Eed* oocyte DEGs  
406 immediately before the onset of DNA methylation, raising the possibility that H3K27me3 could  
407 influence the establishment of other epigenetic modifications in oocytes. While H3K27me3 and  
408 DNA methylation are generally mutually exclusive (44), H3K36me3 coincides with DNA  
409 methylation in oocytes (59) and H3K36me3 deposition increases in regions that subsequently  
410 acquire DNA methylation in oocytes (60). Further, while loss of H3K36me3 in oocytes results in  
411 ectopic H3K27me3 deposition in oocytes (59), it is not known whether H3K36me3 is altered in  
412 oocytes following loss of H3K27me3. As the relationship between DNA methylation/H3K36me3  
413 and H3K27me3 is antagonistic, a potential role of H3K27me3 in oocytes may be to act as a “place  
414 keeper” that ensures the promoters of EED-dependent oocyte genes are not subject to other  
415 forms of epigenetic alteration (Fig. 7), such as DNA methylation or H3K36 methylation (59). Such  
416 an effect may be similar to that proposed for H3K27me3 in protecting regions from DNA  
417 methylation during sperm maturation (47) and may explain both the enrichment of H3K27me3  
418 on genes that regulate fetal development and why H3K27me3 is cleared from these genes during  
419 pre-implantation offspring development.

420

421 As transient PRC2 activity occurs early during oocyte growth and immediately precedes DNMT  
422 activity (61), it is reasonable to speculate that in the absence of H3K27me3 *Eed* oocyte DEGs may  
423 accumulate H3K36 and subsequent DNA methylation. Aberrant establishment of DNA  
424 methylation in *Eed* null oocytes may then contribute to developmental outcomes in subsequent  
425 offspring. To our knowledge, no study has directly measured the impact of maternal PRC2  
426 deletion on global DNA methylation within the oocyte. Inoue *et al.* observed that classically  
427 imprinted gene expression was normal in maternal *Eed*-null embryos and concluded that DNA  
428 methylation establishment at classically imprinted genes was not impacted by *Eed* deletion (33).  
429 However, this does not exclude the possibility that H3K27me3 protects other regions from  
430 establishing DNA methylation in oocytes, particularly the oocyte DEGs identified in this study and  
431 other H3K27me3 enriched genes identified in other studies (33, 35, 44, 46). Further work is  
432 therefore required to determine the potential impact of H3K27me3 loss in primary-secondary  
433 oocytes on the broader epigenetic landscape of mature oocytes.

434

435 The potential for H3K27me3 to guide epigenetic state of target genes in oocytes is of interest, as  
436 using this model we previously observed post-natal overgrowth in offspring derived from oocytes  
437 lacking EED (40). However, another study showed that E10.5 embryos from *Eed*-null oocytes were  
438 growth restricted (33) indicating that loss of EED in oocytes differentially impacts embryonic and  
439 offspring growth. Placental hyperplasia has been attributed to loss of H3K27me3-dependent  
440 imprinting at a small number of genes in mice derived by SCNT (36-38), but is considered to be a  
441 placental effect. While this could lead to large offspring from oocytes lacking EED, it is yet to be  
442 observed in a model with oocyte-specific *Eed* deletion and does not explain why early embryos  
443 were smaller. One explanation could be that loss of maternal PRC2 in the zygote and early pre-  
444 implantation embryo hampers early development. However, an alternative explanation is that  
445 EED and H3K27me3-dependent programming of developmental genes in growing oocytes may  
446 also affect offspring growth and development through an as-yet undefined epigenetically  
447 inherited mechanism, such as altered DNA methylation.

448  
449 Finally, previous studies have demonstrated a link between H3K27me3 and repression of  
450 repetitive sequences when DNA methylation levels are low, including in male and female fetal  
451 germ cells and embryonic stem cells (55-57). However, we did not observe any change in L1  
452 expression in GV oocytes. With the obvious caveat that these sequences may have been  
453 repressed by other epigenetic modifications such as DNA methylation in growing oocytes, our  
454 data indicate that PRC2 is dispensable for repressing L1 sequences, and possibly other repetitive  
455 sequences in GV oocytes.

456  
457 **Conclusions**

458  
459 In summary, we provide evidence that PRC2 acts transiently to establish H3K27me3 on a wide  
460 range of developmental genes in primary-secondary follicle oocytes and that this activity is  
461 required for the repression of these genes in fully-grown oocytes. As this activity precedes DNA  
462 methylation, and loss of H3K36me3 allows inappropriate spreading of H3K27me3 in oocytes, it  
463 seems likely that loss of H3K27me3 will affect other epigenetic programming events in oocytes.  
464 Moreover, as the transient activity of PRC2 in primary to secondary oocytes is distinct from the  
465 established maternal factor activity of PRC2 in pre-implantation embryos, and different gene sets  
466 are affected in oocytes and in pre-implantation embryos, these activities of PRC2 have distinct

467 developmental consequences in offspring. Finally, as common genes are targeted for H3K27me3  
468 enrichment in both mouse and human oocytes, understanding the activity of PRC2 during the  
469 growth of murine oocytes is likely to provide insight not only into non-genetic inheritance, but  
470 also for determining how altered PRC2 activity in oocytes affects human health.

471

472

## 473 **Methods**

474

### 475 **Mouse strains, animal care and ethics**

476 Mice were housed at Monash Medical Centre Animal Facility using a 12h light-dark cycle as  
477 previously reported (40). Food and water were available *ad libitum* with room temperature  
478 maintained at 21-23°C with controlled humidity. All animal work was undertaken in accordance  
479 with Monash University Animal Ethics Committee (AEC) approvals. Mice were obtained from the  
480 following sources: *Zp3Cre* mice (C57BL/6-Tg 93knw/J; Jackson Labs line 003651, constructed and  
481 shared by Prof Barbara Knowles (62)), *Eed* floxed mice (*Eed<sup>fl/fl</sup>*) (B6; 129S1-*Eedtm1Sho*/J; Jackson  
482 Labs line 0022727; constructed and shared by Prof Stuart Orkin (63). The *Eed* line was backcrossed  
483 to a pure C57BL6/J and shared with us by Associate Professor Rhys Allen and Professor Marnie  
484 Blewitt, Walter and Eliza Hall Institute for Medical Research, Melbourne.

485

### 486 **Genotyping**

487 All animals were genotyped via ear punch at weaning by Transnetyx (Cordova, TN) using real-time  
488 PCR assays (details available upon request) designed for each gene as described previously (40).

489

### 490 **Collection, antibody incubation and detection of ovaries for immunofluorescence**

491 Ovaries for immunofluorescence (IF) were fixed in 4% paraformaldehyde (PFA) overnight at 4°C.  
492 Samples were then washed in PBS and processed through 70% ethanol and embedded in paraffin  
493 blocks, sectioned at 5µm and transferred to Superfrost™ Plus slides (Thermo-Fisher). Antigen  
494 retrieval was performed using DAKO Citrate buffer (pH 6.0) at 98°C for 30 minutes and non-  
495 specific binding blocked in PBS containing 5% BSA and 10% donkey serum for 1h at RT. Blocking  
496 solution was replaced with PBS containing 0.1% Triton-X 100 (PBSTX) and appropriately diluted  
497 primary antibodies (Supp. Materials and Methods) and incubated overnight at 4°C. Slides were  
498 washed in PBS and incubated with PBSTX containing secondary antibody for 1h at RT. After final  
499 washes in PBS, slides were rinsed in distilled H<sub>2</sub>O, mounted in DAPI ProLong Gold® and dried

500 overnight. Fluorescence was detected using the VS120 Slide Scanner and quantified using QuPath  
501 Image Analysis Software (QuPath). Background fluorescence in the oocyte cytoplasm was  
502 removed from nuclear intensity. When comparing control versus experimental groups, the  
503 control mean was set to 1.0.

504

### 505 **Collection of oocytes and pre-implantation embryos for immunofluorescence**

506 Ovaries were punctured using 30 G needles to release oocytes. GV oocytes were partially  
507 denuded mechanically using a narrow-bore glass pipette. For MII oocyte and zygote collections,  
508 females were injected with 5 international units (IU) Pregnant Mare Serum Gonadotropin (PMSG)  
509 followed by Human Chorionic Gonadotropin (hCG; 48h interval) and in the case of zygote  
510 collections were bred to C57BL/6 males. MII oocytes or zygotes were removed from the ampulla,  
511 denuded in M2 media containing hyaluronidase (0.3 mg/ml). Samples were either frozen and  
512 used for RNA analysis or fixed in 4% PFA containing 2% Triton X-100 for 30 minutes at RT. Samples  
513 were then washed in PBS containing 0.1% Tween, 0.01% Triton X-100 and 1% BSA (PBST-BSA) and  
514 stored in PBST-BSA.

515

### 516 **Oocyte and zygote whole-mount immunofluorescence**

517 GV, MII oocytes and zygotes were blocked in PBST-BSA containing 10% donkey serum for 1 hour  
518 (h) at RT. The solution was then replaced with PBST-BSA containing appropriately diluted primary  
519 antibodies (Supp. Materials and Methods) and incubated overnight (o/n) at 4°C. Samples were  
520 washed in PBST-BSA and then incubated in PBST-BSA containing secondary antibodies (Supp.  
521 Materials and Methods) for 4h (GVs) or 1h (MII and zygote) in the dark at RT. After washing with  
522 PBST-BSA, samples were incubated with Hoechst 33342 (500 µg/ml) or DAPI (100 µg/ml) for 1h  
523 at RT, washed and stored in PBST-BSA until imaging. Fluorescence was detected using the Nikon  
524 C1 inverted confocal microscope and signal intensity quantified using ImageJ. Background  
525 fluorescence levels were measured in the cytoplasm and removed from nuclear intensity, with  
526 control mean was set to 1.0 for comparisons.

527

### 528 **Collection of oocyte RNA and RNA-sequencing**

529 Cumulus-Oocyte Complexes (COCs) were collected from eight to twelve-week-old female mice  
530 and transferred to M2 media. Oocytes were denuded mechanically with a narrow-bore glass  
531 pipette and incubated with M2 media containing 5 µg/mL Hoechst 33342 for 10 minutes at 37°C.



532 GV oocytes were then scored as either surrounded nucleolus (SN), or non-surrounded nucleolus  
533 (NSN) based on Hoechst staining. SN oocytes were then collected, frozen on dry ice and stored at  
534  $-80^{\circ}\text{C}$  until RNA extraction. Ten to fifteen oocytes isolated from each female were pooled and  
535 total RNA isolated using the Agencourt RNAdvance Cell V2 extraction kit. High quality RNA (RIN  
536  $>7.5$ ) was used for library preparation ( $>1.2\text{ng}$  total RNA) using the Nugen Trio Library protocol,  
537 MU01440V2; 2017. 75bp single end sequencing was carried out on 4-6 libraries / genotype using  
538 Illumina NextSeq500 High output mode and v2.5 chemistry (Illumina Protocol 15046563 v02, Mar  
539 2016) to collect  $>25\text{M}$  reads per sample.

540

### 541 **RNA-sequencing data analyses**

542 Adaptor and low quality sequences in raw sequencing reads were trimmed either using  
543 AdaptorRemoval (64) (v2.2.1) for the oocyte RNA-Seq dataset with the following parameters: --  
544 trimns -- trimqualities --minquality 20 --minlength 35, or using Trimmomatic (65) (v0.39) for bone  
545 growth plate and placental RNA-Seq datasets with the following parameters: LEADING:3  
546 TRAILING:3 SLIDINGWINDOW:4:15 MINLEN:20. Clean reads were mapped to the mouse  
547 reference genome (GRCm38) using either STAR (66) (v2.5.3a) for the oocyte RNA-Seq dataset with  
548 default settings, or STAR (v2.7.5c) for the bone growth plate and placental RNA-Seq datasets with  
549 following settings: outFilterMismatchNoverLmax 0.03 --alignIntronMax 10000. For oocyte RNA-  
550 Seq dataset, raw counts for mouse reference genes (ensembl-release-93) were calculated using  
551 featureCounts (67) (v1.5.2) based on mapped bam files with the following parameters: -Q 10 -s  
552 2. For bone growth plate and placental RNA-Seq datasets, raw counts for mouse reference genes  
553 (ensembl-release-101) were calculated using STAR (v2.7.5c) with parameter "--quantMode  
554 GeneCounts". Raw counts of technical replicates from different sequencing lanes for the same  
555 samples in bone growth plate RNA-Seq dataset were merged. Differential gene expression  
556 analysis was carried out using R package "limma" (68) with "treat" function with parameter as  
557 "lfc=log(1.2)" for the oocyte RNA-Seq dataset or "lfc=log(1.1)" for the bone growth plate and  
558 placental RNA-Seq datasets. Statistically significantly differentially expressed genes were  
559 identified using "FDR  $< 0.05$ ". Gene Ontology (GO) enrichment analysis for significantly  
560 differentially expressed genes was carried out using The Database for Annotation, Visualisation  
561 and Integrated Discovery (DAVID) with following settings: GO term level 3, minimum gene count  
562 5, and FDR  $< 0.05$  (69).

563

## 564 **Analyses of genome-wide H3K27me3 distribution and H3K27me3 datasets in oocytes**

565 *Eed* GV DEGs were compared to publicly available H3K27me3 ChIP-seq, CUT & RUN and CUT &  
566 TAG datasets of oocytes, sperm and pre-implantation embryos. Datasets used are summarised in  
567 Supp. Materials and Methods.

568  
569 For the dataset from Zheng *et al.* 2016 (GSE76687), processed files including whole genome scale  
570 broad H3K27me3 peaks were downloaded and used for the comparison (44). For the dataset from  
571 Liu *et al.* 2016 (GSE73952), H3K27me3 states of the promoter regions of mouse reference genes  
572 were retrieved from Table S1 of the paper and used for the comparison (46). For the dataset from  
573 Erkek *et al.* 2013 (GSE42629), raw sequencing data were downloaded and then adaptor and low-  
574 quality sequences were trimmed using bbduk (v38.94) (47). Clean reads were mapped to the  
575 mouse reference genome (mm9) using bowtie2(70) (v2.4.4) with default settings. H3K27me3  
576 peaks were identified using MACS2(71) (v2.1.1) with the following parameters: -g 1.87e9 --  
577 nomodel --broad -q 0.05. For the dataset from Inoue *et al.* 2018 (GSE116713), bigwig format files  
578 were downloaded and converted to bedGraph format using “bigWigToBedGraph” from UCSC  
579 utilities, and then H3K27me3 peaks were called using MACS2 (v2.1.1) based on the bedGraph files  
580 with the following parameter: -c 1.3 (equivalent to P value < 0.05) (33). For the human dataset  
581 from Xia *et al.* 2019 (GSE124718), processed files including whole genome scale broad H3K27me3  
582 peaks were downloaded and used for the comparison (48).

583  
584 This comparison took the 349 *Eed* GV DEGs and asked whether their promoters (defined as 2Kb  
585 up- or down-stream of TSS to be consistent with Liu *et al.* 2016) overlapped with H3K27me3 peaks  
586 (> 200bp overlap) in the above mentioned publicly available H3K27me3 ChIP or CUT & RUN  
587 datasets. For the human dataset from Xia *et al.* 2019 (GSE124718), human orthologous genes of  
588 mouse 349 *Eed* GV DEGs were identified and used for the comparison.

589  
590 **Statistical Analyses**  
591 GraphPad Prism 9 was used for statistical analysis and to graph datasets. As appropriate,  
592 parametric Student’s *t* tests or ANOVA or non-parametric equivalents as indicated in figure  
593 legends.

594  
595

596 **Declarations**

597

598 **Ethics approval and consent to participate:**

599 All animal work was undertaken in accordance with Monash University Animal Ethics  
600 Committee (AEC) approvals.

601

602 **Consent for publication:**

603 Not applicable

604

605 **Availability of data and materials**

606 All RNA sequencing data have been deposited to the Gene Expression Omnibus (GEO) and are  
607 publicly available with accession number GSE193582. All other information is available from the  
608 corresponding author.

609

610 **Competing interests:**

611 The authors declare that they have no competing interests that affect this work

612

613 **Funding:**

614 This work was supported by grants and research funding from:

615 National Health and Medical Research Project Grant GNT1144966 (PSW, DKG, MvdB, DLA)

616 Hudson Institute of Medical Research (PSW)

617 Victorian Government's Operational Infrastructure Support Program.

618 Monash University Postgraduate Student Awards (EGJ, RO and SP)

619

620 **Author contributions:**

621 Conceived and/or designed experiments/interpreted outcomes: EGJ, TT, ZQ, RO, SP, WTG, DLA,  
622 PSW

623 Performed experiments and/or analysed data: EGJ, ZQ, TT, RO, SP, HB, QZ, JMS, DLA, PSW

624 Bioinformatic analyses and/or comparisons with published datasets: ZQ, EGJ, SMP, DLA, PSW

625 Resources and/or supervision PSW DKG, MvdB, DLA, JC, NAS

626 Writing - original draft: EGJ, PSW, ZQ, RO, SP, NAS, DLA

627 Writing - review & editing: EGJ, PSW, RO, SP, DLA. All authors critically read and approved the  
628 manuscript.

629

630 **Competing interests:** The authors declare that they have no competing interests.

631

632 **Data and materials availability:** With exception of the RNA sequencing data generated in this  
633 study, all data are available in the main text, the Supplementary Materials. The RNA sequencing  
634 data have been deposited in the Gene Expression Omnibus (GEO) and are publicly available with  
635 accession number GSE193582. Published datasets used in this study are summarised in the  
636 Supplementary materials.

637

638 **Acknowledgments:**

639 We thank Dr. Neil Youngson and Prof. Marnie Blewitt for critical comments on the manuscript,  
640 Monash Animal Research Platform staff for assistance with mouse care, Monash Histology  
641 Platform for assistance with slide scanning and the Monash Micro Imaging Facility and MHTP  
642 Medical Genomics Facilities for assistance and technical advice.

## 643 **References**

- 644 1. Esteller M. Epigenetics in cancer. *N Engl J Med*. 2008;358(11):1148-59.
- 645 2. Sharma S, Kelly TK, Jones PA. Epigenetics in cancer. *Carcinogenesis*. 2010;31(1):27-36.
- 646 3. Rosen ED, Kaestner KH, Natarajan R, Patti M-E, Sallari R, Sander M, et al. Epigenetics and  
647 Epigenomics: Implications for Diabetes and Obesity. *Diabetes*. 2018;67(10):1923.
- 648 4. Tran NQV, Miyake K. Neurodevelopmental Disorders and Environmental Toxicants:  
649 Epigenetics as an Underlying Mechanism. *Int J Genom*. 2017;2017:7526592.
- 650 5. Ferguson-Smith AC. Genomic imprinting: the emergence of an epigenetic paradigm. *Nat*  
651 *Rev Genet*. 2011;12:565.
- 652 6. Barlow DP, Bartolomei MS. Genomic Imprinting in Mammals. *Cold Spring Harb Perspect*  
653 *Biol*. 2014;6(2).
- 654 7. Stewart KR, Veselovska L, Kelsey G. Establishment and functions of DNA methylation in  
655 the germline. *Epigenomics*. 2016;8(10):1399-413.
- 656 8. Hanna CW, Kelsey G. Features and mechanisms of canonical and noncanonical genomic  
657 imprinting. *Genes Dev*. 2021;35(11-12):821-34.
- 658 9. Pasini D, Bracken AP, Jensen MR, Denchi EL, Helin K. Suz12 is essential for mouse  
659 development and for EZH2 histone methyltransferase activity. *EMBO J*. 2004;23(20):4061-  
660 71.
- 661 10. Faust C, Schumacher A, Holdener B, Magnuson T. The eed mutation disrupts anterior  
662 mesoderm production in mice. *Development*. 1995;121(2):273-85.
- 663 11. O'Carroll D, Erhardt S, Pagani M, Barton SC, Surani MA, Jenuwein T. The polycomb-group  
664 gene *Ezh2* is required for early mouse development. *Mol Cell Biol*. 2001;21(13):4330-6.
- 665 12. Shen X, Liu Y, Hsu YJ, Fujiwara Y, Kim J, Mao X, et al. EZH1 mediates methylation on  
666 histone H3 lysine 27 and complements EZH2 in maintaining stem cell identity and  
667 executing pluripotency. *Mol Cell*. 2008;32(4):491-502.
- 668 13. He A, Shen X, Ma Q, Cao J, von Gise A, Zhou P, et al. PRC2 directly methylates GATA4 and  
669 represses its transcriptional activity. *Genes Dev*. 2012;26(1):37-42.
- 670 14. Lee JM, Lee JS, Kim H, Kim K, Park H, Kim JY, et al. EZH2 generates a methyl degron that is  
671 recognized by the DCAF1/DDB1/CUL4 E3 ubiquitin ligase complex. *Mol Cell*.  
672 2012;48(4):572-86.
- 673 15. Su IH, Dobenecker MW, Dickinson E, Oser M, Basavaraj A, Marqueron R, et al. Polycomb  
674 group protein *ezh2* controls actin polymerization and cell signaling. *Cell*. 2005;121(3):425-  
675 36.
- 676 16. Gunawan M, Venkatesan N, Loh JT, Wong JF, Berger H, Neo WH, et al. The  
677 methyltransferase *Ezh2* controls cell adhesion and migration through direct methylation  
678 of the extranuclear regulatory protein talin. *Nat Immunol*. 2015;16(5):505-16.
- 679 17. Vasanthakumar A, Xu D, Lun AT, Kueh AJ, van Gisbergen KP, Iannarella N, et al. A non-  
680 canonical function of *Ezh2* preserves immune homeostasis. *EMBO Rep*. 2017;18(4):619-  
681 31.
- 682 18. Wang J, Wang GG. No Easy Way Out for EZH2: Its Pleiotropic, Noncanonical Effects on  
683 Gene Regulation and Cellular Function. *Int J Mol Sci*. 2020;21(24).
- 684 19. Koyen AE, Madden MZ, Park D, Minten EV, Kapoor-Vazirani P, Werner E, et al. EZH2 has a  
685 non-catalytic and PRC2-independent role in stabilizing DDB2 to promote nucleotide  
686 excision repair. *Oncogene*. 2020;39(25):4798-813.
- 687 20. Boyer LA, Plath K, Zeitlinger J, Brambrink T, Medeiros LA, Lee TI, et al. Polycomb  
688 complexes repress developmental regulators in murine embryonic stem cells. *Nature*.  
689 2006;441(7091):349-53.

- 690 21. Cohen AS, Gibson WT. EED-associated overgrowth in a second male patient. *J Hum Genet.* 2016;61(9):831-4.  
691
- 692 22. Cohen AS, Tuysuz B, Shen Y, Bhalla SK, Jones SJ, Gibson WT. A novel mutation in EED  
693 associated with overgrowth. *J Hum Genet.* 2015;60(6):339-42.
- 694 23. Cooney E, Bi W, Schlesinger AE, Vinson S, Potocki L. Novel EED mutation in patient with  
695 Weaver syndrome. *American journal of medical genetics Part A.* 2017;173(2):541-5.
- 696 24. Imagawa E, Higashimoto K, Sakai Y, Numakura C, Okamoto N, Matsunaga S, et al.  
697 Mutations in genes encoding polycomb repressive complex 2 subunits cause Weaver  
698 syndrome. *Hum Mutat.* 2017;38(6):637-48.
- 699 25. Tatton-Brown K, Hanks S, Ruark E, Zachariou A, Duarte Sdel V, Ramsay E, et al. Germline  
700 mutations in the oncogene EZH2 cause Weaver syndrome and increased human height.  
701 *Oncotarget.* 2011;2(12):1127-33.
- 702 26. Tatton-Brown K, Loveday C, Yost S, Clarke M, Ramsay E, Zachariou A, et al. Mutations in  
703 Epigenetic Regulation Genes Are a Major Cause of Overgrowth with Intellectual Disability.  
704 *Am J Hum Genet.* 2017;100(5):725-36.
- 705 27. Gibson WT, Hood RL, Zhan SH, Bulman DE, Fejes AP, Moore R, et al. Mutations in EZH2  
706 cause Weaver syndrome. *Am J Hum Genet.* 2012;90(1):110-8.
- 707 28. Cohen AS, Yap DB, Lewis ME, Chijiwa C, Ramos-Arroyo MA, Tkachenko N, et al. Weaver  
708 Syndrome-Associated EZH2 Protein Variants Show Impaired Histone Methyltransferase  
709 Function In Vitro. *Hum Mutat.* 2016;37(3):301-7.
- 710 29. Cyrus SS, Cohen ASA, Agbahovbe R, Avela K, Yeung KS, Chung BHY, et al. Rare SUZ12  
711 variants commonly cause an overgrowth phenotype. *Am J Med Genet C Semin Med  
712 Genet.* 2019;181(4):532-47.
- 713 30. Imagawa E, Albuquerque EVA, Isidor B, Mitsuhashi S, Mizuguchi T, Miyatake S, et al. Novel  
714 SUZ12 mutations in Weaver-like syndrome. *Clin Genet.* 2018;94(5):461-6.
- 715 31. Erhardt S, Su IH, Schneider R, Barton S, Bannister AJ, Perez-Burgos L, et al. Consequences  
716 of the depletion of zygotic and embryonic enhancer of zeste 2 during preimplantation  
717 mouse development. *Development.* 2003;130(18):4235-48.
- 718 32. Inoue A, Jiang L, Lu F, Zhang Y. Genomic imprinting of Xist by maternal H3K27me3. *Genes  
719 Dev.* 2017;31(19):1927-32.
- 720 33. Inoue A, Chen Z, Yin Q, Zhang Y. Maternal Eed knockout causes loss of H3K27me3  
721 imprinting and random X inactivation in the extraembryonic cells. *Genes Dev.* 2018;32(23-  
722 24):1525-36.
- 723 34. Harris C, Cloutier M, Trotter M, Hinten M, Gayen S, Du Z, et al. Conversion of random X-  
724 inactivation to imprinted X-inactivation by maternal PRC2. *eLife.* 2019;8:e44258.
- 725 35. Inoue A, Jiang L, Lu F, Suzuki T, Zhang Y. Maternal H3K27me3 controls DNA methylation-  
726 independent imprinting. *Nature.* 2017;547:419.
- 727 36. Inoue K, Ogonuki N, Kamimura S, Inoue H, Matoba S, Hirose M, et al. Loss of H3K27me3  
728 imprinting in the Sfmbt2 miRNA cluster causes enlargement of cloned mouse placentas.  
729 *Nat Commun.* 2020;11(1):2150.
- 730 37. Wang L-Y, Li Z-K, Wang L-B, Liu C, Sun X-H, Feng G-H, et al. Overcoming Intrinsic  
731 H3K27me3 Imprinting Barriers Improves Post-implantation Development after Somatic  
732 Cell Nuclear Transfer. *Cell Stem Cell.* 2020;27(2):315-25.e5.
- 733 38. Xie Z, Zhang W, Zhang Y. Loss of Slc38a4 imprinting is a major cause of mouse placenta  
734 hyperplasia in somatic cell nuclear transferred embryos at late gestation. *Cell Rep.*  
735 2022;38(8):110407.

- 736 39. Chen Z, Zhang Y. Maternal H3K27me3-dependent autosomal and X chromosome  
737 imprinting. *Nat Rev Genet.* 2020;21(9):555-71.
- 738 40. Prokopuk L, Stringer J, White R, Vossen R, White S, Cohen A, et al. Loss of maternal EED  
739 results in postnatal overgrowth. *Clin Epigenetics.* 2018;10(1):95.
- 740 41. Puschendorf M, Terranova R, Boutsma E, Mao X, Isono K-i, Brykczynska U, et al. PRC1 and  
741 Suv39h specify parental asymmetry at constitutive heterochromatin in early mouse  
742 embryos. *Nat Genet.* 2008;40(4):411-20.
- 743 42. Qu Y, Lu D, Jiang H, Chi X, Zhang H. EZH2 is required for mouse oocyte meiotic maturation  
744 by interacting with and stabilizing spindle assembly checkpoint protein BubRI. *Nucleic  
745 Acids Res.* 2016;44(16):7659-72.
- 746 43. Wang H, Paulson EE, Ma L, Ross PJ, Schultz RM. Paternal genome rescues mouse  
747 preimplantation embryo development in the absence of maternally-recruited EZH2  
748 activity. *Epigenetics.* 2019;14(1):94-108.
- 749 44. Zheng H, Huang B, Zhang B, Xiang Y, Du Z, Xu Q, et al. Resetting Epigenetic Memory by  
750 Reprogramming of Histone Modifications in Mammals. *Mol Cell.* 2016;63(6):1066-79.
- 751 45. Lewandoski M, Wassarman KM, Martin GR. Zp3-cre, a transgenic mouse line for the  
752 activation or inactivation of loxP-flanked target genes specifically in the female germ line.  
753 *Curr Biol.* 1997;7(2):148-51.
- 754 46. Liu X, Wang C, Liu W, Li J, Li C, Kou X, et al. Distinct features of H3K4me3 and H3K27me3  
755 chromatin domains in pre-implantation embryos. *Nature.* 2016;537(7621):558-62.
- 756 47. Erkek S, Hisano M, Liang CY, Gill M, Murr R, Dieker J, et al. Molecular determinants of  
757 nucleosome retention at CpG-rich sequences in mouse spermatozoa. *Nat Struct Mol Biol.*  
758 2013;20(7):868-75.
- 759 48. Xia W, Xu J, Yu G, Yao G, Xu K, Ma X, et al. Resetting histone modifications during human  
760 parental-to-zygotic transition. *Science.* 2019;365(6451):353.
- 761 49. Andergassen D, Dotter CP, Wenzel D, Sigl V, Bammer PC, Muckenhuber M, et al. Mapping  
762 the mouse Allelome reveals tissue-specific regulation of allelic expression. *eLife.*  
763 2017;6:e25125.
- 764 50. Wanigasuriya I, Gouil Q, Kinkel SA, Tapia del Fierro A, Beck T, Roper EA, et al. Smchd1 is a  
765 maternal effect gene required for genomic imprinting. *eLife.* 2020;9:e55529.
- 766 51. Sugimoto M, Abe K. X chromosome reactivation initiates in nascent primordial germ cells  
767 in mice. *PLoS Genet.* 2007;3(7):e116.
- 768 52. Chua de Sousa Lopes SM, Hayashi K, Shovlin TC, Mifsud W, Surani MA, McLaren A. X  
769 chromosome activity in mouse XX primordial germ cells. *PLoS Genet.* 2008;4(2):e30.
- 770 53. Talon I, Janiszewski A, Chappell J, Vanheer L, Pasque V. Recent Advances in Understanding  
771 the Reversal of Gene Silencing During X Chromosome Reactivation. *Front Cell Dev Biol.*  
772 2019;7.
- 773 54. Prokopuk L, Stringer JM, Hogg K, Elgass KD, Western PS. PRC2 is required for extensive  
774 reorganization of H3K27me3 during epigenetic reprogramming in mouse fetal germ cells.  
775 *Epigenetics Chromatin.* 2017;10(7).
- 776 55. Stringer JM, Forster SC, Qu Z, Prokopuk L, O'Bryan MK, Gardner DK, et al. Reduced PRC2  
777 function alters male germline epigenetic programming and paternal inheritance. *BMC  
778 Biol.* 2018;16(1):104.
- 779 56. Huang T-C, Wang Y-F, Vazquez-Ferrer E, Theofel I, Requena CE, Hanna CW, et al. Sex-  
780 specific chromatin remodelling safeguards transcription in germ cells. *Nature.*  
781 2021;600(7890):737-42.

- 782 57. Walter M, Teissandier A, Perez-Palacios R, Bourc'his D. An epigenetic switch ensures  
783 transposon repression upon dynamic loss of DNA methylation in embryonic stem cells.  
784 *eLife*. 2016;5:e11418.
- 785 58. Chen Z, Yin Q, Inoue A, Zhang C, Zhang Y. Allelic H3K27me3 to allelic DNA methylation  
786 switch maintains noncanonical imprinting in extraembryonic cells. *Sci Adv*.  
787 2019;5(12):eaay7246.
- 788 59. Xu Q, Xiang Y, Wang Q, Wang L, Brind'Amour J, Bogutz AB, et al. SETD2 regulates the  
789 maternal epigenome, genomic imprinting and embryonic development. *Nat Genet*.  
790 2019;51(5):844-56.
- 791 60. Stewart KR, Veselovska L, Kim J, Huang J, Saadeh H, Tomizawa S-i, et al. Dynamic changes  
792 in histone modifications precede de novo DNA methylation in oocytes. *Genes Dev*.  
793 2015;29(23):2449-62.
- 794 61. Lucifero D, La Salle S, Bourc'his D, Martel J, Bestor TH, Trasler JM. Coordinate regulation of  
795 DNA methyltransferase expression during oogenesis. *BMC Dev Biol*. 2007;7(1):36.
- 796 62. de Vries WN, Binns LT, Fancher KS, Dean J, Moore R, Kemler R, et al. Expression of Cre  
797 recombinase in mouse oocytes: a means to study maternal effect genes. *Genesis*  
798 2000;26(2):110-2.
- 799 63. Yu M, Riva L, Xie H, Schindler Y, Moran TB, Cheng Y, et al. Insights into GATA-1-mediated  
800 gene activation versus repression via genome-wide chromatin occupancy analysis. *Mol*  
801 *Cell*. 2009;36(4):682-95.
- 802 64. Schubert M, Lindgreen S, Orlando L. AdapterRemoval v2: rapid adapter trimming,  
803 identification, and read merging. *BMC Res Notes*. 2016;9(1):88.
- 804 65. Bolger AM, Lohse M, Usadel B. Trimmomatic: a flexible trimmer for Illumina sequence  
805 data. *Bioinformatics*. 2014;30(15):2114-20.
- 806 66. Dobin A, Davis CA, Schlesinger F, Drenkow J, Zaleski C, Jha S, et al. STAR: ultrafast universal  
807 RNA-seq aligner. *Bioinformatics*. 2013;29(1):15-21.
- 808 67. Liao Y, Smyth GK, Shi W. featureCounts: an efficient general purpose program for  
809 assigning sequence reads to genomic features. *Bioinformatics*. 2014;30(7):923-30.
- 810 68. Ritchie ME, Phipson B, Wu D, Hu Y, Law CW, Shi W, et al. limma powers differential  
811 expression analyses for RNA-sequencing and microarray studies. *Nucleic Acids Res*.  
812 2015;43(7):e47-e.
- 813 69. Dennis G, Jr., Sherman BT, Hosack DA, Yang J, Gao W, Lane HC, et al. DAVID: Database for  
814 Annotation, Visualization, and Integrated Discovery. *Genome biology*. 2003;4(5):P3.
- 815 70. Langmead B, Salzberg SL. Fast gapped-read alignment with Bowtie 2. *Nat Methods*.  
816 2012;9(4):357-9.
- 817 71. Zhang Y, Liu T, Meyer CA, Eeckhoutte J, Johnson DS, Bernstein BE, et al. Model-based  
818 Analysis of ChIP-Seq (MACS). *Genome Biol*. 2008;9(9):R137.

819  
820  
821  
822

823

824

825 **Figures:**

826

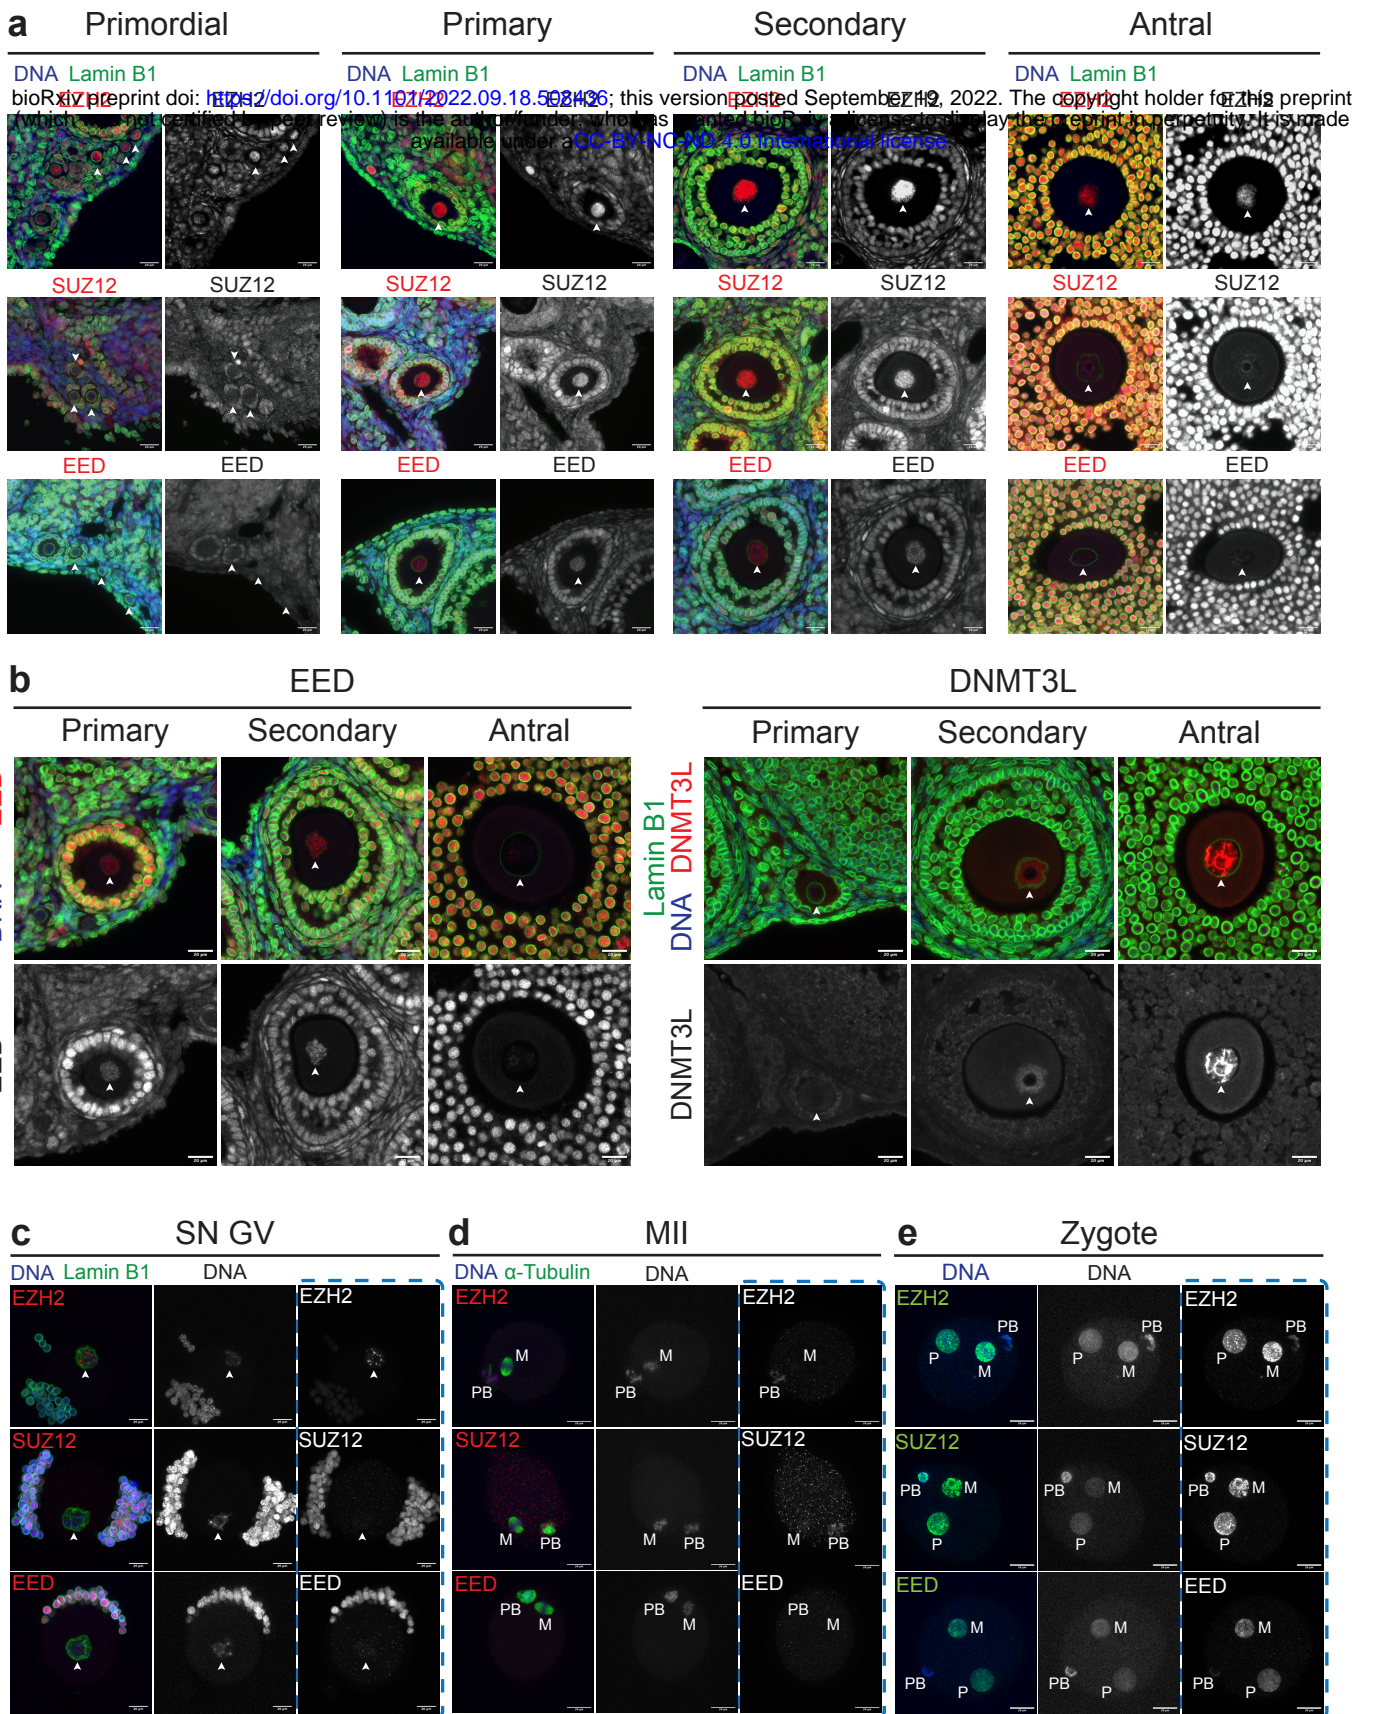

**Fig 1**



827 **Fig 1. PRC2 acts transiently within primary and secondary follicle growing oocytes. (a-d)**  
828 Representative images of EZH2, SUZ12 and EED (red) IF analysis in **(a)** primordial, primary,  
829 secondary and antral follicles. **(b)** Comparison of EED (red, left panels) versus DNMT3L (red, right  
830 panels) IF analysis in primary, secondary and antral follicles. **(c)** Surrounded nucleolus (SN) GV  
831 oocytes. **(d)** MII oocytes.  $\alpha$ -Tubulin (green) identifies meiotic spindles. M: metaphase plate, PB:  
832 polar body. **(e)** Zygotes 12h after fertilisation for  $\geq 10$  zygotes imaged per antibody combination.  
833 M: maternal pronucleus, P: paternal pronucleus, PB: polar body. In **a-c** white arrowheads indicate  
834 the oocyte nucleus defined by Lamin B1 (green) and DAPI (blue) shows DNA. In **c-e** images  
835 represent compressed z-stack images of wholemount oocytes or zygotes. Scale bars: 20  $\mu$ m.  
836 Images in **a** and **b** are representative of two ovaries from three separate females and in **c-e** images  
837 are representative of  $\geq 10$  oocytes per antibody combination.  
838

**a** *Eed-wt* *Eed-hom*

bioRxiv preprint doi: <https://doi.org/10.1101/2022.09.18.508436>; this version posted September 19, 2022. The copyright holder for this preprint (which was not certified by peer review) is the author/funder, who has granted bioRxiv a license to display the preprint in perpetuity. It is made available under aCC-BY-NC-ND 4.0 International license.

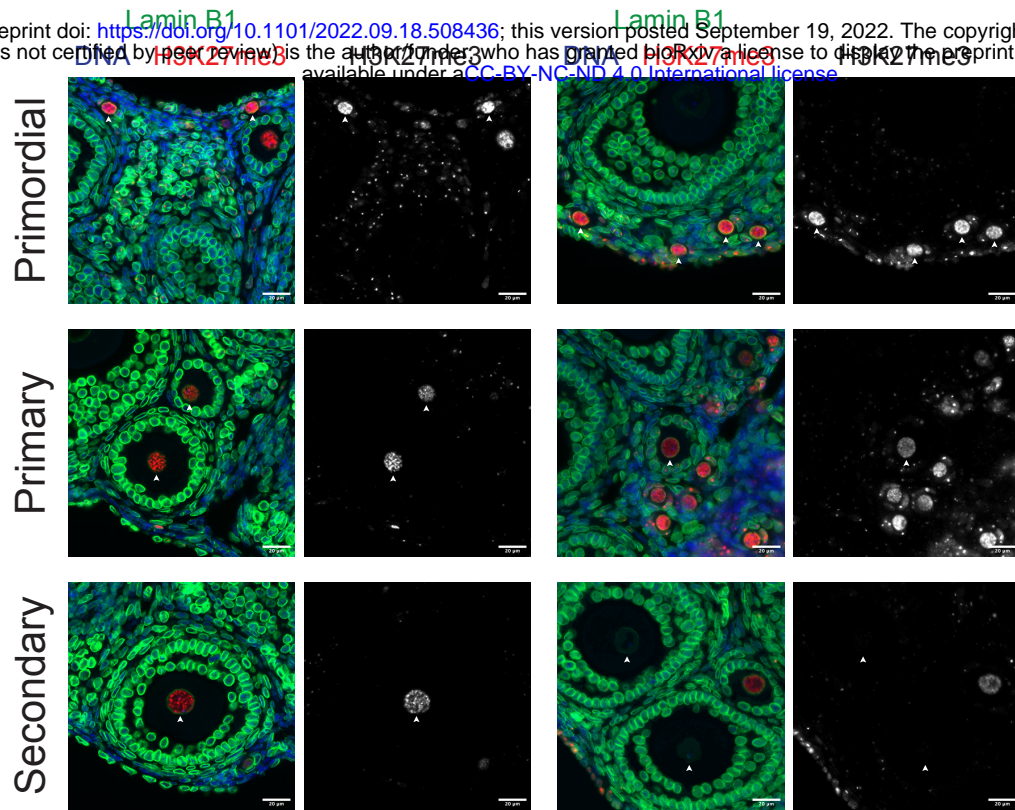

**b** Primary **c** Secondary

H3K27me3

H3K27me3

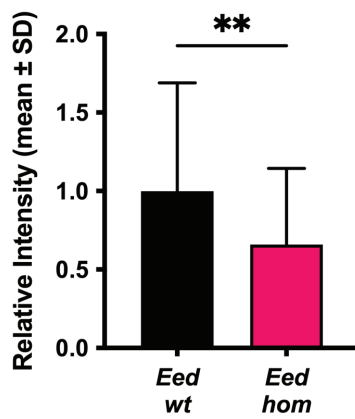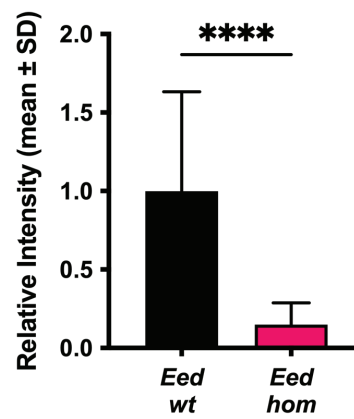

**Fig 2**

839 **Fig 2. Deletion of *Eed* in oocytes reduced H3K27me3 in oocytes of primary and secondary**  
840 **follicles. (a)** Representative images of H3K27me3 (red) immunostaining analysis in primordial  
841 (top), primary (middle) and secondary (bottom) follicle oocytes from *Eed-wt* and *Eed-hom*  
842 females. White arrowheads indicate the oocyte nucleus as defined by Lamin B1 (green). DAPI  
843 (blue) shows DNA in somatic cells. Images are representative of two ovaries from three biological  
844 replicates. Scale bars: 20  $\mu$ m. **(b-c)** Quantification of H3K27me3 within oocyte nuclei of primary  
845 **(b)** and secondary **(c)** follicles from *Eed-wt* and *Eed-hom* females. Average intensity of *Eed-wt* was  
846 set to 1.0. **\*\*** $P < 0.005$ , two-tailed Mann-Whitney U test, N = 63 *Eed-wt* and 67 *Eed-hom* primary  
847 follicle oocytes. **\*\*\*\*** $P < 0.0001$ , two-tailed Mann-Whitney U test, N = 45 *Eed-wt* and 47 *Eed-hom*  
848 secondary follicle oocytes. Error bars represent mean  $\pm$  standard deviation.  
849

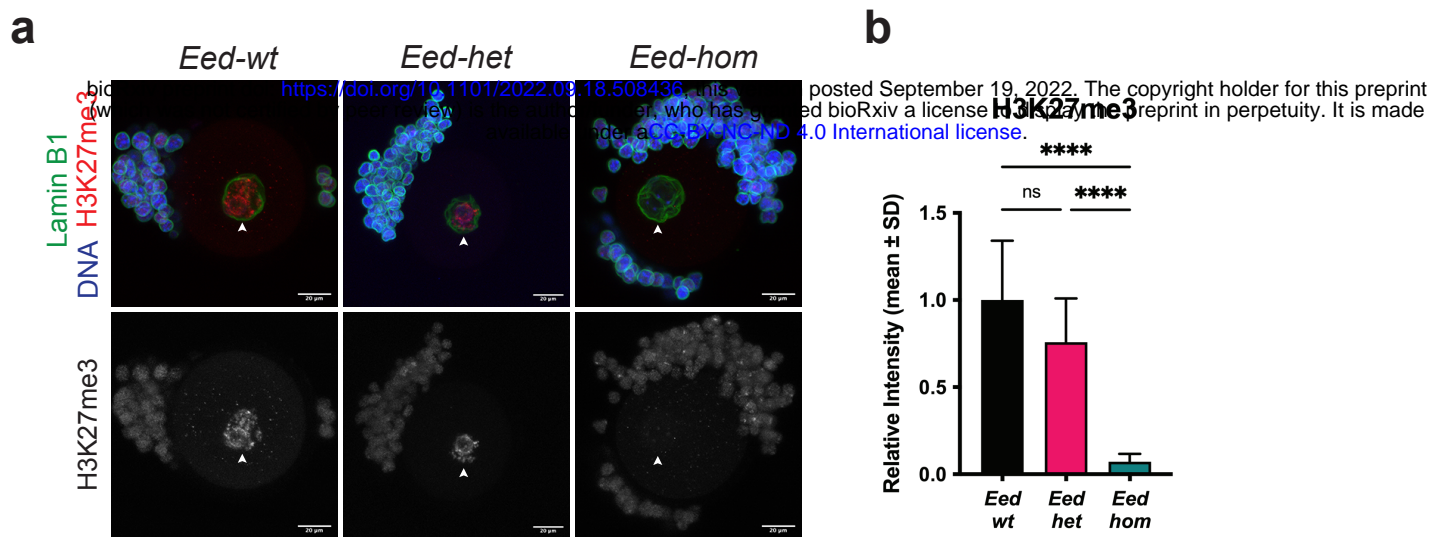

**c** PCA: *Eed-hom* vs Controls

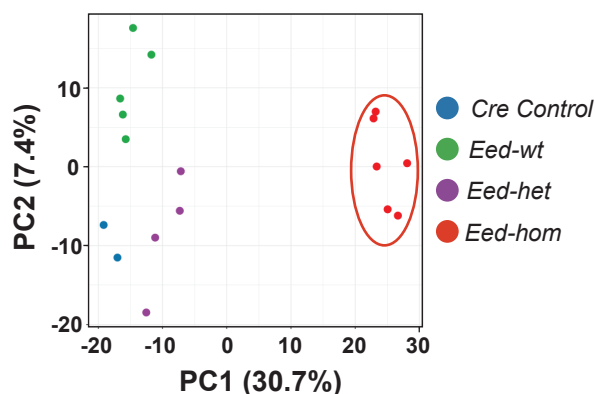

**d** *Eed-het* vs *Eed-hom* DEGs

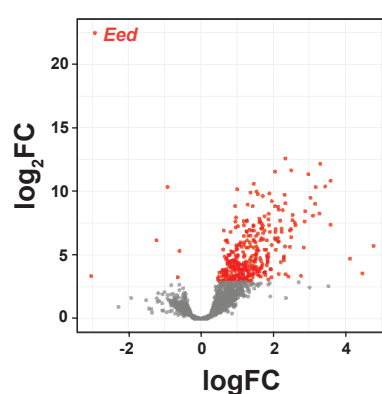

**e** *Eed*

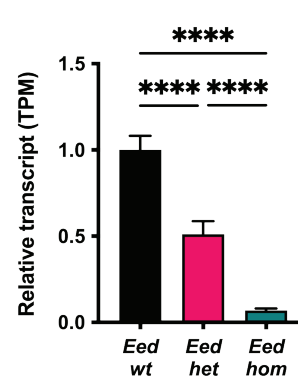

**f** *Eed-het* vs *Eed-hom* GO enrichment analysis top 10 Biological Processes

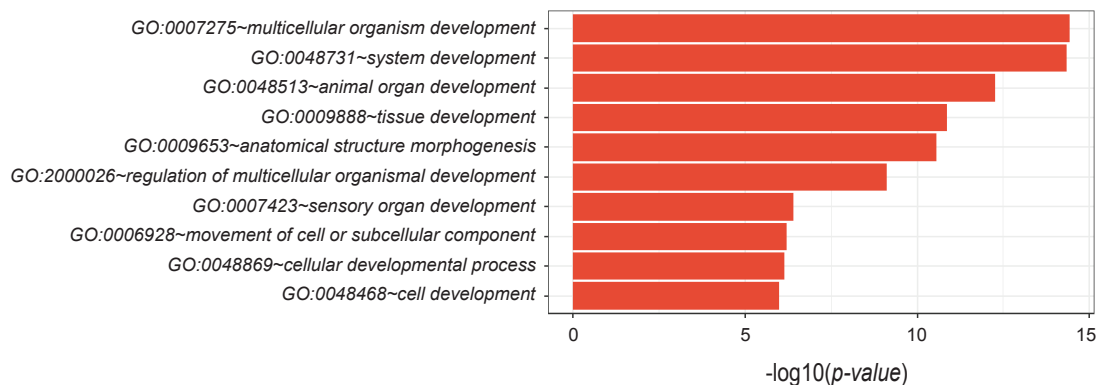

**g** *Eed* oocyte DEGs enriched for developmental genes

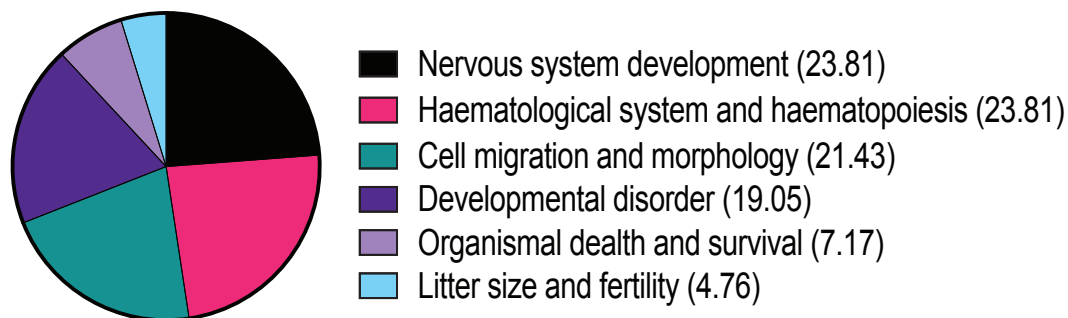

Fig 3

850 **Fig 3. *Eed* is required for H3K27me3 establishment and developmental gene silencing in growing**  
851 **oocytes. (a,b)** Representative images **(a)** and quantification **(b)** of H3K27me3 (red) IF in *Eed-wt*,  
852 *Eed-het*, and *Eed-hom* SN GV oocytes. White arrowheads indicate the oocyte nucleus as defined  
853 by Lamin B1 (green). DAPI (blue) shows DNA in somatic cells. Images represent 3-4 females per  
854 genotype, with 16-21 oocytes imaged per genotype. Scale bars: 20  $\mu$ m. Average intensity of *Eed-*  
855 *wt* was set to 1.0. \*\*\*\* $P < 0.0001$ , Kruskal-Wallis test plus Dunn's multiple comparisons test,  
856 error bars represent mean  $\pm$  standard deviation. **(c)** Principal Component Analysis (PCA) of  
857 RNAseq data for *Eed-hom* (n=6) vs *Eed-het* (n=4), *Eed-wt* (n=5) and *Eed-wt Cre* (n=2) controls. **(d)**  
858 Differential gene expression analysis of *Eed-het* vs *Eed-hom* oocytes represented by volcano plot  
859 showing logFC against statistical significance. Genes with FDR-adjusted  $P < 0.05$  are coloured in  
860 red. Deletion of *Eed* resulted in 349 significant DEGs (*Eed* oocyte DEGs), with 343 genes  
861 upregulated and 6 genes downregulated, including *Eed*. **(e)** Relative *Eed* transcript levels  
862 (transcripts per million reads; TPM) in *Eed-wt*, *Eed-het* and *Eed-hom* GV oocytes. Average  
863 expression of *Eed-wt* was set to 1.0. **(f)** GO enrichment analysis of *Eed* oocyte DEGs representing  
864 the top 10 significantly different biological processes impacted. **(f)** Pie chart displaying the  
865 proportion of significant pathways identified using Ingenuity pathway analysis  
866  
867

**a** *Eed* oocyte DEGs vs H3K27me3 ChIP

bioRxiv preprint doi: <https://doi.org/10.1101/2022.09.18.508436>; this version posted September 19, 2022. The copyright holder for this preprint (which was not certified by peer review) is the author/funder, who has granted bioRxiv a license to display the preprint in perpetuity. It is made available under aCC-BY-NC-ND 4.0 International license.

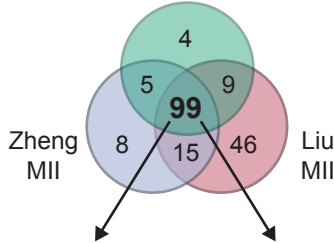

**d** *Eed* oocyte DEGs in Human GV Oocytes

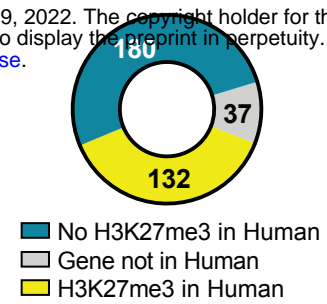

**b** High Confidence H3K27me3 *Eed* DEGs

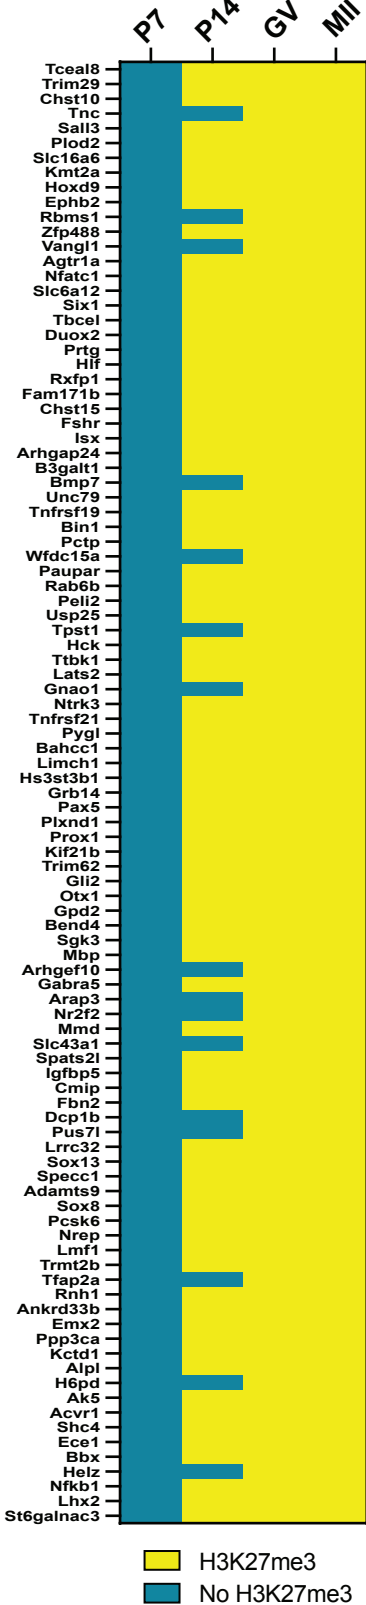

**c** Expression Fold Change for High Confidence H3K27me3 *Eed* DEGs

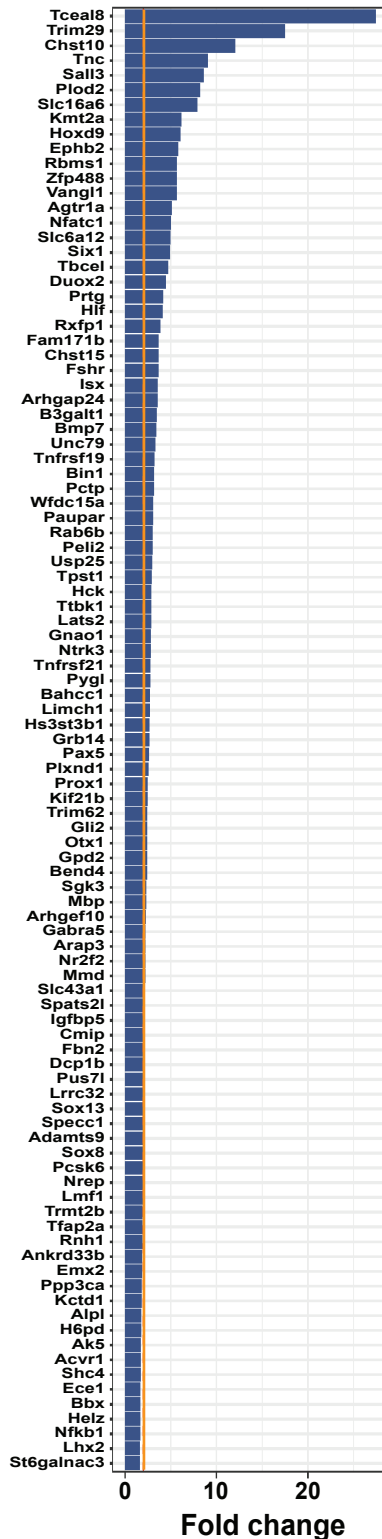

**e** Expression Fold Change for *Eed* DEGs with H3K27me3 in Human Oocytes

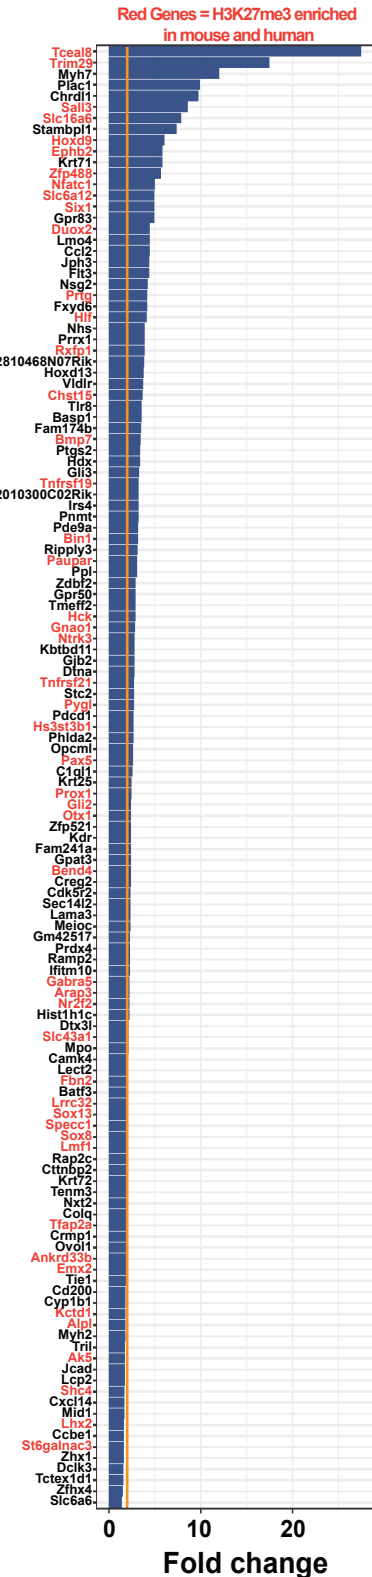

**Fig 4**

868 **Fig 4. H3K27me3 is established on *Eed* oocyte DEGs in primary – secondary mouse oocytes and**  
869 **is conserved in human GV oocytes (a)** Venn diagram showing *Eed* oocyte DEGs that contained  
870 H3K27me3 promoter peaks in GV and MII oocyte H3K27me3 ChIP-seq datasets (44, 46)  
871 identifying 99 ‘high confidence’ H3K27me3 enriched *Eed* oocyte DEGs. **(b)** Heat map showing  
872 promoter H3K27me3 enrichment status of 99 high confidence H3K27me3 enriched *Eed* oocyte  
873 DEGs identified in P7, P14, GV and MII oocyte H3K27me3 ChIP-seq datasets from Liu *et al.*, and  
874 Zheng *et al.*, (44, 46). Blue: No H3K27me3 peaks, yellow: indicates presence of H3K27me3 peaks.  
875 **(c)** Expression fold change of the 99 high confidence H3K27me3 enriched *Eed* oocyte DEGs in *Eed-*  
876 *hom* oocytes relative to *Eed-het*. Orange line indicates two-fold change **(d)** Donut chart showing  
877 the promoter H3K27me3 enrichment status of *Eed* oocyte DEGs in Human GV oocytes (48). Grey:  
878 Not conserved in humans, blue: no H3K27me3 peaks in promoter, yellow: H3K27me3 peak  
879 present in promoter. **(e)** Expression fold change of 132 mouse *Eed* oocyte DEGs that were  
880 H3K27me3 enriched in human GV oocytes. *Eed* oocyte DEGs commonly enriched for H3K27me3  
881 in human and mouse GV oocytes are marked with genes names in red. Orange line indicates two-  
882 fold change. For **(a,b and d)**, promoter region was defined as 2000bp upstream and downstream  
883 of TSS, overlap of > 200bp H3K27me3 peaks with the promoter region was considered H3K27me3  
884 enriched.  
885  
886

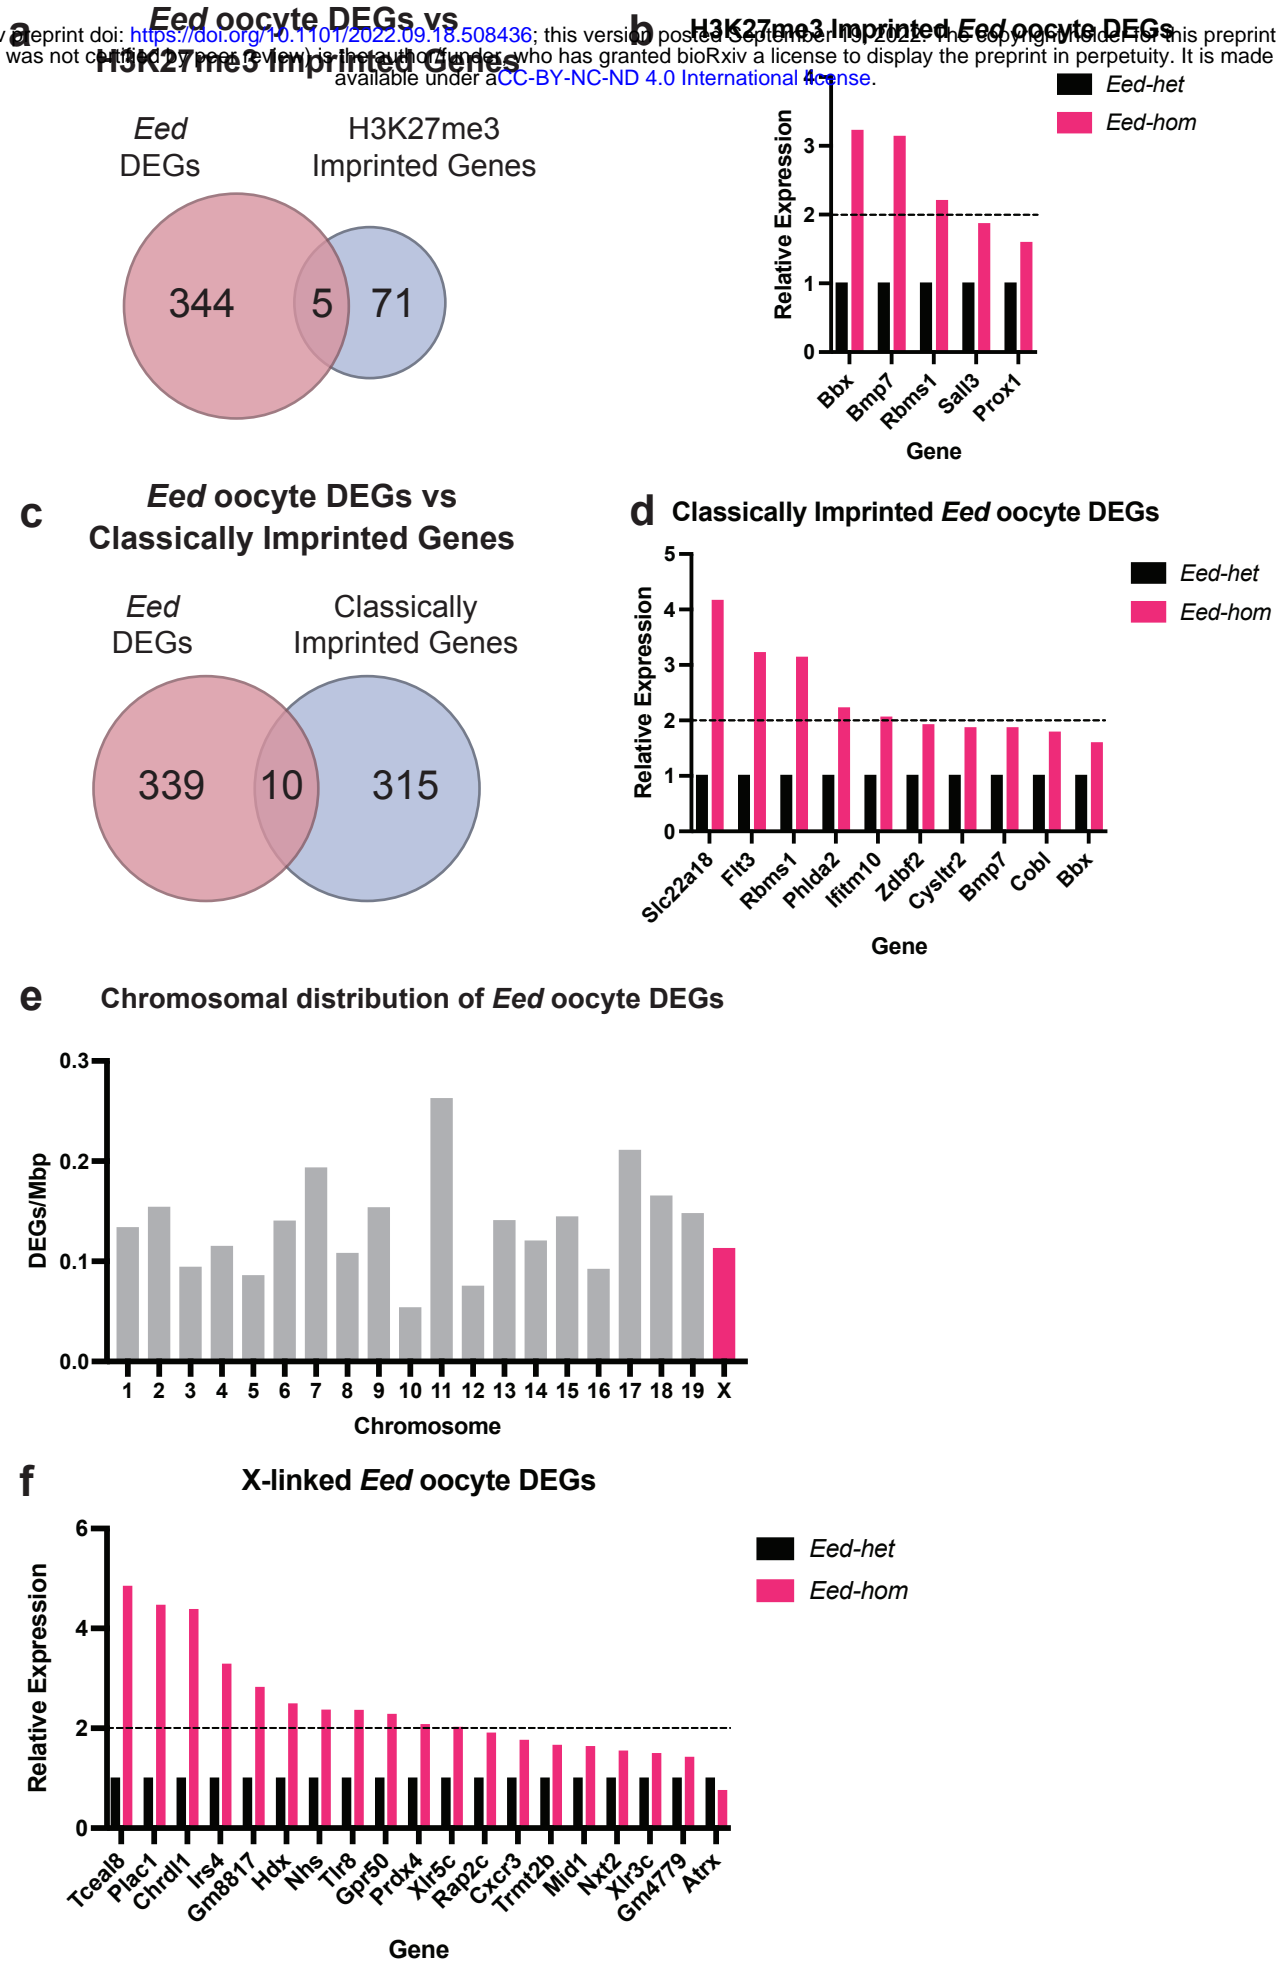

Fig 5



887 **Fig 5. EED is required for repressing a wide range of genes in growing oocytes that are not**  
888 **canonically or non-canonically imprinted or X-linked genes (a)** Venn diagram comparing *Eed*  
889 oocyte DEGs against putative H3K27me3 imprinted genes (35). **(b)** Expression of putative  
890 H3K27me3 imprinted *Eed* oocyte DEGs in *Eed-hom* oocyte relative to *Eed-het*. Data represent the  
891 mean transcripts per million (TPM), with *Eed-het* mean set to 1.0. **(c)** Venn diagram comparing  
892 *Eed* oocyte DEGs against known or predicted classically imprinted genes (49, 50). **(d)** Expression  
893 of known or predicted classically imprinted *Eed* oocyte DEGs in *Eed-hom* oocyte relative to *Eed-*  
894 *het*. Data represent the mean transcripts per million (TPM), with *Eed-het* mean set to 1.0. **(e)**  
895 graphical representation of *Eed* oocyte DEGs per mega base vs chromosome for autosome and  
896 the X-chromosome. **(f)** Expression of X-linked *Eed* oocyte DEGs in *Eed-hom* oocyte relative to *Eed-*  
897 *het*. Data represent the mean transcripts per million (TPM), with *Eed-het* mean set to 1.0.  
898  
899

**a****PCA: *Eed-hom* vs Controls**

bioRxiv preprint doi: <https://doi.org/10.1101/2022.09.18.508436>; this version posted September 19, 2022. The copyright holder for this preprint (which was not certified by peer review) is the author/funder, who has granted bioRxiv a license to display the preprint in perpetuity. It is made available under aCC-BY-NC-ND 4.0 International license.

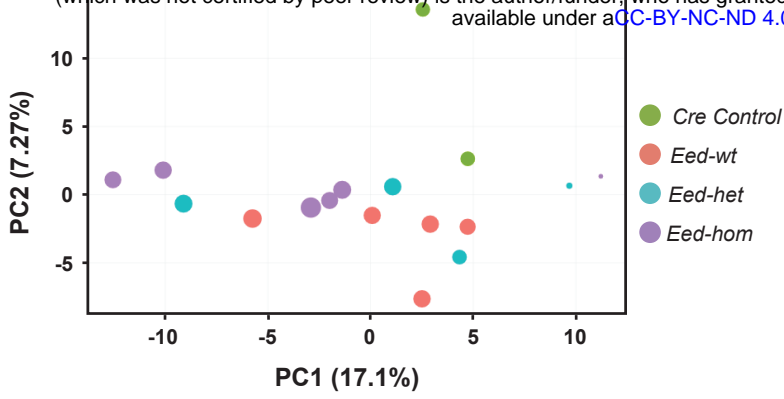**b****L1 expression: *Eed-het* vs *Eed-hom***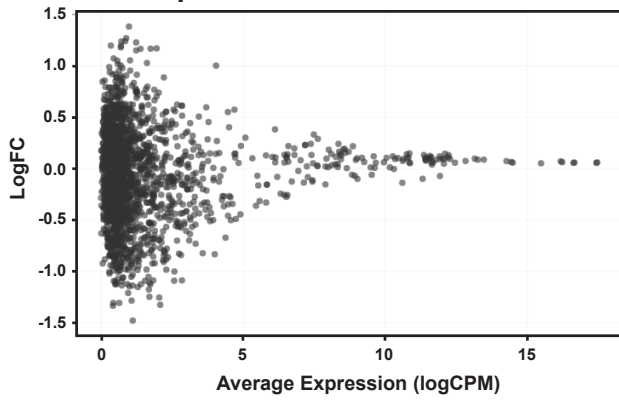

900 **Fig 6. Loss of *Eed* in growing oocytes did not impact expression of LINE-1 transposons. (a)**  
901 Principal Component Analysis (PCA) of RNA-seq data for L1 elements in *Eed-hom* (n=6) vs *Eed-het*  
902 (n=4), *Eed-wt* (n=5) and *Eed-wt Cre* (n=2) controls. **(b)** Differential expression analysis of L1  
903 elements for *Eed-het* versus *Eed-hom* females.

904

905

906

907

## Oocyte Epigenetic Programming

## Maternal PRC2

## Offspring Development

PRC2

DNMTs

PRC2

**Growing oocytes of follicles:**  
Primary Secondary Antral

Fully-grown oocyte

MII

Zygote

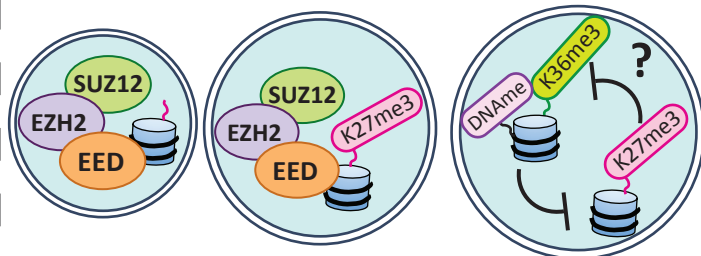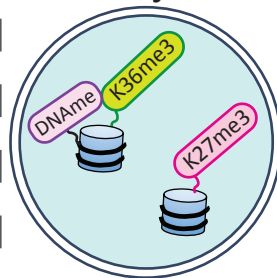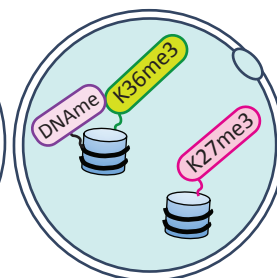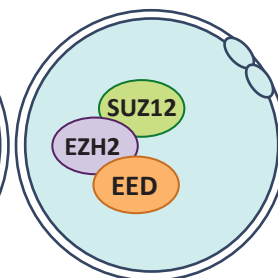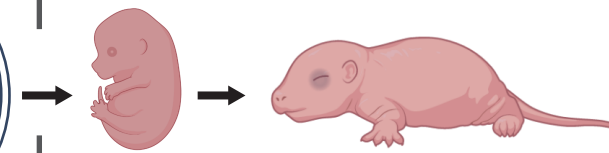

**Growth Restriction**

**Overgrowth**

### Oocyte Epigenetic Programming

*Establishment of H3K27me3 at developmental genes and H3K27me3 imprints*

*Establishment of DNA methylation including genomic imprints*

### Maternal PRC2

*X-Inactivation Imprinting*

*Maternal-Paternal equivalence at non-imprinted sequences?*

*Impacts of EED loss in oocytes on offspring*

Oocyte growth and programming

Fetal

Postnatal

**Fig 7**

908 **Fig 7: Summary of PRC2 functions during oocyte growth and maturation and pre-implantation**  
909 **development.** All three essential components of PRC2 are present in growing oocytes only at the  
910 primary to secondary stages and establish H3K27me3 on H3K27me3 imprinted genes and a wide  
911 range of developmental genes, potentially programming *Eed* oocyte DEG expression in offspring.  
912 As this activity immediately precedes *de novo* DNA methylation, we propose that H3K27me3  
913 established prior to DNA methylation may act as a “place-keeper” protecting developmental  
914 genes from modifications such as H3K36me3 and/or DNA methylation. Cytoplasmic PRC2  
915 proteins and/or mRNA are inherited via the mature oocyte and regulate pre-implantation  
916 development, including X-inactivation, H3K27me3 dependent imprinting (31, 34, 35) and  
917 establishment of maternal – paternal equivalence at non-imprinted sequences. Loss of PRC2 in  
918 the oocyte leads to embryo growth restriction (33) but offspring are ultimately overgrown  
919 immediately after birth (40).  
920
